# Supplementary material
Source: PubMed Central journal article supplement (PMC8168324)
Supplement: NIHMS1700932-supplement-Supplementary_material.pdf [file NIHMS1700932-supplement-Supplementary_material.pdf]

## Appendix

### Association of maternal thyroid function with birth weight: a systematic review and individual-participant data meta-analysis

| Table of contents:                                                                                                                                                                                           | Page |
|--------------------------------------------------------------------------------------------------------------------------------------------------------------------------------------------------------------|------|
| Study Protocol.....                                                                                                                                                                                          | 3    |
| Supplemental Methods.....                                                                                                                                                                                    | 7    |
| Supplemental Table 1A. Maternal demographics per cohort.....                                                                                                                                                 | 10   |
| Supplemental Table 1B. Maternal thyroid function test results per cohort.....                                                                                                                                | 11   |
| Supplemental Table 1C. Description of euthyroidism and thyroid function test abnormalities per cohort.....                                                                                                   | 12   |
| Supplemental Table 1D. Description of pregnancy characteristics per cohort.....                                                                                                                              | 13   |
| Supplemental Table 1E. Percentage of missing data of covariates per cohort.....                                                                                                                              | 14   |
| Supplemental Table 1F. Overview of iodine status of the included cohorts.....                                                                                                                                | 15   |
| Supplemental Table 2. Date and place of data collection for the included cohorts.....                                                                                                                        | 16   |
| Supplemental Table 3. Cohort-specific cut-offs of TSH and FT4 to defined thyroid function tests abnormalities.....                                                                                           | 17   |
| Supplemental Table 4. Comparison of thyroid function in the population with or without data on birth weight.....                                                                                             | 18   |
| Supplemental Table 5. Association of thyroid antibodies with birth weight.....                                                                                                                               | 19   |
| Supplemental Table 6A. <i>P</i> values for the interaction terms of thyroid function test abnormalities as well as thyroid function tests with relevant variables in association with main birth weight..... | 20   |
| Supplemental Table 6B. Association of FT4, subclinical hypothyroidism or isolated hypothyroxinemia with birth weight outcomes according to trimesters of pregnancy.....                                      | 21   |
| Supplemental Table 6C. Association of TSH and FT4 with birth weight according to maternal age                                                                                                                | 22   |
| Supplemental Table 6D. Association of FT4 with birth weight according to maternal BMI.....                                                                                                                   | 23   |
| Supplemental Table 7. Association of TSH and FT4 with birth weight according to TPOAb status                                                                                                                 | 24   |
| Supplemental Table 8. Association of thyroid function test abnormalities as well as TSH and FT4 concentrations with low birth weight.....                                                                    | 25   |
| Supplemental Table 9. Association of thyroid function test abnormalities as well as TSH and FT4 concentrations with macrosomia.....                                                                          | 26   |

|                                                                                                                                                                                                              |    |
|--------------------------------------------------------------------------------------------------------------------------------------------------------------------------------------------------------------|----|
| <b>Supplemental Table 10.</b> Association of thyroid function test abnormalities as well as TSH and FT4 concentrations with small for gestational age according to adjustment with gestational diabetes..... | 27 |
| <b>Supplemental Table 11.</b> Association of thyroid function test abnormalities as well as TSH and FT4 concentrations with large for gestational age according to adjustment with gestational diabetes..... | 28 |
| <b>Supplemental Table 12.</b> Association of thyroid function test abnormalities as well as TSH and FT4 concentrations with birth weight according to adjustment with gestational diabetes.....              | 29 |
| <b>Supplemental Table 13.</b> Association of thyroid function test abnormalities as well as TSH and FT4 concentrations with small for gestational age according to adjustment with preeclampsia.....         | 30 |
| <b>Supplemental Table 14.</b> Association of thyroid function test abnormalities as well as TSH and FT4 concentrations with large for gestational age according to adjustment with preeclampsia.....         | 31 |
| <b>Supplemental Table 15.</b> Association of thyroid function test abnormalities as well as TSH and FT4 concentrations with birth weight according to adjustment with preeclampsia.....                      | 32 |
| <b>Supplemental Table 16.</b> Crude association of thyroid function test abnormalities with birth weight                                                                                                     | 33 |
| <b>Supplemental Table 17.</b> Crude association of TSH and FT4 concentrations with birth weight.....                                                                                                         | 34 |
| <b>Supplemental Table 18.</b> Cohort-specific quality assessment by The Newcastle-Ottawa Scale.....                                                                                                          | 35 |
| <b>Supplemental Figure 1.</b> Association of TSH or FT4 with birth weight according to TPOAb status..                                                                                                        | 37 |
| <b>Supplemental Figure 2.</b> Two-step meta-analyses and funnel plots for the association of subclinical hypothyroidism with SGA, LGA or BW.....                                                             | 38 |
| <b>Supplemental Figure 3.</b> Two-step meta-analyses and funnel plots for the association of overt hyperthyroidism with SGA, LGA or BW.....                                                                  | 39 |
| <b>Supplemental Figure 4.</b> Two-step meta-analyses and funnel plots for the association of subclinical hyperthyroidism with SGA, LGA or BW.....                                                            | 40 |
| <b>Supplemental Figure 5.</b> Two-step meta-analyses and funnel plots for the association of hypothyroxinemia with SGA, LGA or BW.....                                                                       | 41 |
| <b>Supplemental Figure 6.</b> Two-step meta-analyses and funnel plots for the association of TSH with SGA, LGA or BW.....                                                                                    | 42 |
| <b>Supplemental Figure 7.</b> Two-step meta-analyses and funnel plots for the association of FT4 with SGA, LGA or BW.....                                                                                    | 43 |
| <b>Supplemental Figure 8.</b> Two-step meta-analyses and funnel plots for the association of TPOAb positivity with SGA, LGA or BW.....                                                                       | 44 |
| <b>Supplemental Figure 9.</b> Two-step meta-analyses and funnel plots for the association of TgAb positivity with SGA, LGA or BW.....                                                                        | 45 |
| <b>Supplemental acknowledgements and grant details.....</b>                                                                                                                                                  | 46 |

The association of maternal thyroid function and thyroid autoimmunity with offspring birth-weight

*Tim Korevaar, Peter Taylor, Colin Dayan, Robin Peeters*

### Citation

Tim Korevaar, Peter Taylor, Colin Dayan, Robin Peeters. The association of maternal thyroid function and thyroid autoimmunity with offspring birth-weight. PROSPERO 2016 CRD42016043496 Available from:  
[http://www.crd.york.ac.uk/PROSPERO/display\\_record.php?ID=CRD42016043496](http://www.crd.york.ac.uk/PROSPERO/display_record.php?ID=CRD42016043496)

### Review question

What is the association of maternal TSH, FT4, FT3 and thyroid autoimmunity (TPOAbs or TgAbs) with birth weight?

What is the association of maternal disease entities (i.e. overt and subclinical hypothyroidism, overt and subclinical hyperthyroidism and hypothyroxinemia with birth weight?

### Searches

We will search Embase, MEDLINE (Ovid), Web of Science, Cochrane and Google Scholar.

The search strategy will include only terms relating to or describing the exposure and/or intervention.

There will be no language restrictions.

The searches will be re-run before final analyses, if applicable further studies retrieved for inclusion.

In order to obtain unpublished data we will:

- Select from the search, and contact authors that have published studies on thyroid function during pregnancy with different outcomes.

- Use our personal network.

- Publish an invitation to join our research consortium (the consortium on thyroid an pregnancy) in various journals (Thyroid, European Thyroid Journal, Obstetrics & Gynecology).

- Announce our consortium and IPD meta-analysis at various conferences (ETA, ATA, ICE-CSE).

- Advertise our consortium via social media (twitter, researchgate).

Additional details about the search strategy can be found in the attached PDF document (link provided below).

### Search strategy

[http://www.crd.york.ac.uk/PROSPEROFILES/43496\\_STRATEGY\\_20160624.pdf](http://www.crd.york.ac.uk/PROSPEROFILES/43496_STRATEGY_20160624.pdf)

### Types of study to be included

- Non-selected or population-based prospective cohorts. - Data on exposure and outcomes should be obtained/registered prospectively. - Exceptions can be made if authors are willing to retrospectively ascertain data on other covariates that were not prospectively collected during the initial study.

### Condition or domain being studied

Birth weight and gestational age-standardized birth weight.

### Participants/population

- Non-selected or population-based prospective cohorts.

- Serum TSH, or FT4 or thyroid antibodies measured in pregnant women (any gestational age).

- Follow-up complete until the end of pregnancy.

- Disease-specific prospective cohorts can be included for specific studies when deemed relevant.

### Intervention(s), exposure(s)

It is well established that both overt hypothyroidism and overt hyperthyroidism in pregnancy result in profound adverse outcomes particularly premature birth and foetal loss 1,2. Though evidence of its effects on birth-weight are more limited, particularly any occurring independently of gestational age. Subclinical hypothyroidism; (SCH) the presence of an elevated TSH with a normal free thyroxine level is correlated with preterm delivery, placental abruption and need for admission to the special care baby unit (SCBU) 3-7 but its

## PROSPERO

### International prospective register of systematic reviews

effect on weight is less well understood. A recent meta-analysis identified that subclinical hypothyroidism, but not IH was associated with intra uterine growth restriction 8 and even variation in TSH within the normal pregnancy reference range was an independent risk factor for being small for gestational age 9. Isolated hypothyroxinemia (IH) the presence of a lower free thyroxine with a normal TSH level is associated primarily with impaired neuropsychological development of offspring 10-12 although it has also been associated with both macrosomia 13 and prematurity 14.

Given the growing debate about the need for universal thyroid screening in pregnancy 15 having a greater understanding of TSH and free thyroxine thresholds that might be associated with an unacceptable risk of harm would be desirable. Whilst gestational age also influenced by thyroid status is likely to be a key determinant it is important to ascertain if there is a substantial independent effect on birth-weight. Cohort studies so far have been unable to study effect thresholds and have been unable to quantify precisely the effects of overt or sub-optimal thyroid function, hence the need for this meta-analysis.

### Comparator(s)/control

Continuous analyses are preferred, disease entities compared to euthyroid controls.

### Context

Exclusion criteria: Fertility treatment, twin pregnancy, thyroid medication usage, pre-existing thyroid disease.

### Main outcome(s)

Birth weight.

### Additional outcome(s)

Low birth weight, high birth weight, FGR, macrosomia.

### Data extraction (selection and coding)

Titles and/or abstracts of studies retrieved using the search strategy and those from additional sources will be screened independently by two review authors (TK and PT) to identify studies that potentially meet the inclusion criteria outlined above. The full text of these potentially eligible studies will be retrieved and independently assessed for eligibility by two review team members (TK and PT). Any disagreement between them over the eligibility of particular studies will be resolved through discussion with a third reviewer (RP). Those responsible for the included studies will be asked to supply line by line individual participant data according to a standardized data codebook file (Excel) and will be cleaned and checked by study lead author (TK).

### Risk of bias (quality) assessment

Per cohort, we will check the randomness of missing data and internal data consistency. Any discrepancies or unusual patterns will be checked with the study investigator. Funnel plots will be constructed for the primary outcome. Measures to identify unpublished data have been outlined in above

### Strategy for data synthesis

Primary analysis:

- 1) The continuous association of maternal TSH, FT4 and TPOAbs with birthweight.
- TSH, FT4 and TPOAb SD scores will be calculated per population and studied in order to retain inter-individual differences. Percentile scores will be calculated per cohort and studied to define optimal population-based cut-offs.

Secondary analyses:

- 1) The association of (sub)clinical thyroid disease entities and TPOAb positivity with birth-weight outcomes.
- Percentile scores will be calculated per cohort and different population-based cut-offs for clinical disease entities will be calculated define optimal population-based cut-offs.
- 2) The association of TgAbs with birth-weight.
- Similar methodology as for TPOAbs.

Pre-specified sensitivity analyses:

- 3) Effects of TSH and FT4 in women with and without TPO and/or Tg antibody positivity.
- 4) Stratification per week of gestational age of serum measurement.

Pre-specified interactions:

- 5) With known risk factors (maternal age, diabetes, BMI, smoking, ethnicity gestational age).

Additional analysis:

## PROSPERO

### International prospective register of systematic reviews

- 6) Funnel plot to evaluate publication bias.
- 7) Comparison of women in the cohorts and their offspring in women with and without thyroid function available.
- 8) Analysis repeated with women with GDM/ or known diabetes excluded.

#### Statistical analyses:

We will study the above described associations by performing an individual participant based meta-analysis (combining raw data). We will use both a one-step and two-step approach. For the one step, TSH, FT4 and TPOAb concentrations will be standardized to SD scores and per cohort and analyzed utilizing models with random intercepts and slopes per cohort. In addition, we aim to extract effect thresholds by calculating percentile scores per cohort and assess the risk of outcomes per percentile. For the two-step approach, TSH, FT4 and TPOAb concentrations will be standardized to SD scores and/or percentile scores per cohort and analyses performed in each cohort will be pooled.

#### Analysis of subgroups or subsets

Specified above.

#### Contact details for further information

Tim Korevaar  
t.korevaar@erasmusmc.nl

#### Organisational affiliation of the review

Erasmus University Medical Center

#### Review team members and their organisational affiliations

Dr Tim Korevaar. Erasmus University Medical Center  
Dr Peter Taylor. Cardiff University  
Professor Colin Dayan. Cardiff University  
Professor Robin Peeters. Room Na-2913, Department of Epidemiology and Endocrinology, Erasmus Medical Center Postbus 2040, 3000 CA Rotterdam, The Netherlands

#### Type and method of review

Individual patient data (Individual patient data (IPD) meta-analysis) meta-analysis, Systematic review

#### Anticipated or actual start date

01 July 2016

#### Anticipated completion date

01 July 2017

#### Funding sources/sponsors

The Netherlands Organisation for Health Research and Development (ZonMw), project number 90700412

#### Conflicts of interest

None known

#### Language

English

#### Country

Wales, Netherlands

#### Published protocol

[http://www.crd.york.ac.uk/PROSPEROFILES/43496\\_PROTOCOL\\_20160624.pdf](http://www.crd.york.ac.uk/PROSPEROFILES/43496_PROTOCOL_20160624.pdf)

#### Stage of review

Review Ongoing

#### Subject index terms status

**PROSPERO**  
International prospective register of systematic reviews

Subject indexing assigned by CRD

**Subject index terms**

Autoimmunity; Birth Weight; Humans; Infant, Extremely Low Birth Weight; Infant Health; Infant, Low Birth Weight; Infant, Newborn; Infant, Very Low Birth Weight; Maternal Health; Pregnancy Outcome; Thyroid Gland; Thyroid Hormones

**Date of registration in PROSPERO**

10 August 2016

**Date of publication of this version**

10 August 2016

**Details of any existing review of the same topic by the same authors****Stage of review at time of this submission**

| <b>Stage</b>                                                    | <b>Started</b> | <b>Completed</b> |
|-----------------------------------------------------------------|----------------|------------------|
| Preliminary searches                                            | Yes            | Yes              |
| Piloting of the study selection process                         | Yes            | Yes              |
| Formal screening of search results against eligibility criteria | Yes            | No               |
| Data extraction                                                 | No             | No               |
| Risk of bias (quality) assessment                               | No             | No               |
| Data analysis                                                   | No             | No               |

**Versions**

10 August 2016

**PROSPERO**

This information has been provided by the named contact for this review. CRD has accepted this information in good faith and registered the review in PROSPERO. The registrant confirms that the information supplied for this submission is accurate and complete. CRD bears no responsibility or liability for the content of this registration record, any associated files or external websites.

## Supplemental methods:

### Search strategies

In addition, we searched in other sources, including bibliographies of key articles in the field and those included in this review. Secondly, to identify cohorts with available data but without published studies, we used our personal contacts in the field, advertised at various conferences, and published open invitations to join the consortium in relevant medical journals and on social media (Twitter and Researchgate).<sup>1,2</sup> For optimal quality and comparability of the studies, we formulated general inclusion criteria *a priori*.

### Search terms

#### Embase.com

(thyroid function'/exp OR 'thyroid function test'/de OR 'thyroid disease'/exp OR 'thyrotropin'/de OR 'thyrotropin blood level'/de OR 'thyroid hormone'/de OR 'thyroid hormone blood level'/exp OR 'thyroid peroxidase antibody'/exp OR 'thyroglobulin antibody'/de OR ((thyroid\* NEAR/3 (function\* OR dysfunction\* OR disorder\* OR disease\* OR autoimmun\* OR auto-immun\* OR hormone\* OR autoantibod\* OR antibod\*)) OR thyroidit\* OR hyperthyro\* OR hypothyro\* OR thyrotropin\* OR tsh OR ((t4 OR ft4 OR t-4 OR ft-4 OR tsh OR liothyronin\* OR thyroxin\*) NEAR/3 (free OR plasma OR blood OR serum OR level\* OR concentrat\* OR low OR high OR elevat\* OR decrease\* OR increase\*)) OR (thyroid\* NEAR/3 peroxidase\* NEAR/3 antibod\*) OR ((tpo OR thyroglobulin\* OR thyroperoxidase\* OR thyroperoxid\*) NEAR/3 (antibod\* OR positiv\* OR negativ\* OR status\*)) OR euthyroid\* OR graves OR goiter):ab,ti) AND ('pregnancy'/exp OR 'pregnant woman'/de OR 'mother'/de OR 'prenatal exposure'/de OR 'pregnancy outcome'/de OR 'pregnancy disorder'/de OR 'pregnancy complication'/de OR 'prenatal period'/de OR 'prenatal growth'/de OR (pregnan\* OR mother\* OR prenatal\* OR maternal\*):ab,ti) AND ('prematurity'/exp OR 'premature fetus membrane rupture'/de OR 'birth weight'/exp OR 'fetus growth'/de OR 'premature labor'/de OR 'prenatal growth'/de OR (prematu\* OR preterm\* OR pre-term\* OR 'birth weight' OR 'neonat\* weight' OR 'birthweight' OR lbw OR vlbw OR elbw OR ((fetus OR fetal OR foetal OR foetus) NEAR/3 (growth OR weight)) OR (gestation\* NEAR/3 (age OR week\*) NEAR/6 (birth OR childbirth OR born OR deliver\*)):ab,ti) NOT ([animals]/lim NOT [humans]/lim) NOT ([Conference Abstract]/lim OR [Letter]/lim OR [Note]/lim OR [Editorial]/lim)

#### Medline Ovid

("Thyroid Function Tests"/ OR exp "Thyroid Diseases"/ OR "Thyrotropin"/ OR exp "Thyroid Hormones"/ OR ((thyroid\* ADJ3 (function\* OR dysfunction\* OR disorder\* OR disease\* OR autoimmun\* OR auto-immun\* OR hormone\* OR autoantibod\* OR antibod\*)) OR thyroidit\* OR hyperthyro\* OR hypothyro\* OR thyrotropin\* OR tsh OR ((t4 OR ft4 OR t-4 OR ft-4 OR tsh OR liothyronin\* OR thyroxin\*) ADJ3 (free OR plasma OR blood OR serum OR level\* OR concentrat\* OR low OR high OR elevat\* OR decrease\* OR increase\*)) OR (thyroid\* ADJ3 peroxidase\* ADJ3 antibod\*) OR ((tpo OR thyroglobulin\* OR thyroperoxidase\* OR thyroperoxid\*) ADJ3 (antibod\* OR positiv\* OR negativ\* OR status\*)) OR euthyroid\* OR graves OR goiter).ab,ti.) AND (exp "pregnancy"/ OR "pregnant women"/ OR "mothers"/ OR "pregnancy outcome"/ OR "pregnancy complications"/ OR "Fetal Weight"/ OR (pregnan\* OR mother\* OR prenatal\* OR maternal\*).ab,ti.) AND (exp "Infant, Premature"/ OR exp "Obstetric Labor, Premature"/ OR "Fetal Membranes, Premature Rupture"/ OR "birth weight"/ OR exp "Infant, Low Birth Weight"/ OR (prematu\* OR preterm\* OR pre-term\* OR "birth weight" OR "neonat\* weight" OR "birthweight" OR lbw OR vlbw OR elbw OR ((fetus OR fetal OR foetal OR foetus) ADJ3 (growth OR weight)) OR (gestation\* ADJ3 (age OR week\*) ADJ6 (birth OR childbirth OR born OR deliver\*))).ab,ti.) NOT (exp animals/ NOT humans/) NOT (letter OR news OR comment OR editorial OR congresses OR abstracts).pt.

#### Cochrane

((thyroid\* NEAR/3 (function\* OR dysfunction\* OR disorder\* OR disease\* OR autoimmun\* OR auto-immun\* OR hormone\* OR autoantibod\* OR antibod\*)) OR thyroidit\* OR hyperthyro\* OR hypothyro\* OR thyrotropin\* OR tsh OR ((t4 OR ft4 OR t-4 OR ft-4 OR tsh OR liothyronin\* OR thyroxin\*) NEAR/3 (free OR plasma OR blood OR serum OR level\* OR concentrat\* OR low OR high OR elevat\* OR decrease\* OR increase\*)) OR (thyroid\* NEAR/3 peroxidase\* NEAR/3 antibod\*) OR ((tpo OR thyroglobulin\* OR thyroperoxidase\* OR thyroperoxid\*) NEAR/3 (antibod\* OR positiv\* OR negativ\* OR status\*)) OR euthyroid\* OR graves OR goiter):ab,ti) AND ((pregnan\* OR mother\* OR prenatal\* OR maternal\*):ab,ti) AND ((prematu\* OR preterm\* OR pre-term\* OR 'birth weight' OR 'neonat\* weight' OR 'birthweight' OR lbw OR vlbw OR elbw OR ((fetus OR fetal OR foetal OR foetus) NEAR/3 (growth OR weight)) OR (gestation\* NEAR/3 (age OR week\*) NEAR/6 (birth OR childbirth OR born OR deliver\*)):ab,ti)

### Web of science

TS=(((thyroid\* NEAR/2 (function\* OR dysfunction\* OR disorder\* OR disease\* OR autoimmun\* OR auto-immun\* OR hormone\* OR autoantibod\* OR antibod\*)) OR thyroidit\* OR hyperthyo\* OR hypothyro\* OR thyrotropin\* OR tsh OR ((t4 OR ft4 OR t-4 OR ft-4 OR tsh OR liothyronin\* OR thyroxin\*) NEAR/2 (free OR plasma OR blood OR serum OR level\* OR concentrat\* OR low OR high OR elevat\* OR decrease\* OR increase\*)) OR (thyroid\* NEAR/2 peroxidase\* NEAR/2 antibod\*) OR ((tpo OR thyroglobulin\* OR thyroperoxidase\* OR thyroperoxid\*) NEAR/2 (antibod\* OR positiv\* OR negativ\* OR status\*)) OR euthyroid\* OR graves OR goiter)) AND ((pregnan\* OR mother\* OR prenatal\* OR maternal\*)) AND ((premat\* OR preterm\* OR pre-term\* OR "birth weight" OR "neonat\* weight" OR "birthweight" OR lbw OR vlbw OR elbw OR ((fetus OR fetal OR foetal OR foetus) NEAR/2 (growth OR weight)) OR (gestation\* NEAR/2 (age OR week\*) NEAR/5 (birth OR childbirth OR born OR deliver\*)))) NOT ((animal\* OR rat OR rats OR mouse OR mice OR murine OR dog OR dogs OR canine OR sheep OR ovine OR tadpole\* OR frog OR frogs OR ewe OR lamb OR lambs OR pig OR swine OR porcine OR cow OR cows OR bovine OR baboon OR monkey OR primate\*)) NOT (human\* OR patient\*)) AND DT=(article)

### Google scholar

"thyroid function|dysfunction|"t4|tsh|tpo level|concentration|"blood|plasma|serum t4|tsh|tpo"  
pregnancy|pregnant|mother|prenatal|maternal premature|preterm|"birth weight"|birthweight|"fetal|foetal growth|weight

The search was repeated on October 15th, 2019, to identify studies published after March 18, 2018, that would have been eligible for inclusion. We identified 5 studies that were published after finalization of our systematic search on March 18th 2018 that would have otherwise been eligible for inclusion.<sup>3-7</sup>

### Data collection

We were not able to collect data on previous history of giving birth to a small for gestational age newborn, history of stillbirth or prevalent renal disease due to a lack of data availability in included cohorts.

### Statistical analyses

For the crude models to assess potential confounding, all analyses of SGA and LGA were only adjusted for maternal age. For birth weight, the adjustments were maternal age, fetal sex and gestational age at birth.

We assessed mixed model assumptions and the model fit by inspection of residuals, the Akaike information criteria, non-linearity and log-likelihood tests comparing multilevel models with random intercepts and/or slope per cohort, if applicable.

In the two-step meta-analysis of thyroid function test abnormalities, due to complete or quasi-complete separation of regression models for some cohorts with very small or 0 number of events/exposures, we combined the cohorts with such characteristics to obtain more reliable effect estimates.

### Sensitivity analyses

First, we assessed differential data availability within cohorts by comparing thyroid function between women with and without available data on birth weight. Second, analyses of the primary outcomes for TSH and FT4 were also repeated in women with concentrations within the normal range (2.5th-97.5th percentiles) and analyses on LBW were repeated for term new-borns only ( $\geq 37$  weeks). Third, we investigated whether the association of thyroid function test abnormalities or TSH and FT4



concentrations with birth weight differed according to gestational age at the time of blood sampling, foetal sex, maternal age, BMI and smoking by adding a product interaction term into the models and stratifying the analysis if there was any indication of effect modification. Fourth, we studied whether the association of TSH or FT4 with birth weight differed according to TPOAb or TgAb positivity by adding product interaction terms to the models and stratifying the analysis if required. Finally, we assessed whether maternal gestational diabetes mellitus or preeclampsia could be mediators in the association of interest by adding these variables to the regression models.

#### *Deviations from protocol*

During the course of the study we deviated from the pre-specified protocol by (1) adding an analysis in which we adjust for gestational diabetes mellitus rather than excluding women with gestational diabetes mellitus to preserve statistical power on the basis of novel insights from coauthors, (2) by not reporting analyses after exclusion of women with pre-existing diabetes mellitus because of the low number of affected women (N=129), (3) by additionally investigating whether adjustment for preeclampsia would change the main results on the basis of new co-author insights, (4) we did not investigate TPOAb or weekly gestational age cut-offs according to standardized percentiles because we lacked statistical power for such analyses.

#### **References:**

1. Korevaar TI, Taylor PN, Dayan CM, Peeters RP. An Invitation to Join the Consortium on Thyroid and Pregnancy. *Eur Thyroid J* 2016; 5:277
2. Korevaar TI, Taylor PN, Dayan CM, Peeters RP. An Invitation to Join the Consortium on Thyroid and Pregnancy. *Obstet Gynecol* 2016; 128:913
3. Abel, Marianne Hope, et al. "Iodine intake is associated with thyroid function in mild to moderately iodine deficient pregnant women." *Thyroid* 28.10 (2018): 1359-1371.
4. Su, P. Y., et al. "Dose-response relationship between maternal thyroid hormones in the first twenty weeks and physical and neuropsychological development of infants: A prospective cohort study in China." *Zhonghua liu xing bing xue za zhi= Zhonghua liuxingbingxue zazhi* 40.2 (2019): 180-185.
5. Wang, Xu, et al. "Evaluation of maternal exposure to PM2. 5 and its components on maternal and neonatal thyroid function and birth weight: a cohort study." *Thyroid* 29.8 (2019): 1147-1157.
6. Zhang, Yindi, et al. "Association of Overt and Subclinical Hyperthyroidism During Weeks 4–8 with Adverse Pregnancy Outcomes." *Journal of Women's Health*. Jun 2019. ahead of print <http://doi.org/10.1089/jwh.2018.7180>
7. Sun, Xiaojie, et al. "Maternal heavy metal exposure, thyroid hormones, and birth outcomes: a prospective cohort study." *The Journal of Clinical Endocrinology & Metabolism*, Volume 104, Issue 11, November 2019, Pages 5043–5052, <https://doi.org/10.1210/jc.2018-02492>

**Supplemental Table 1A.** Maternal demographics per cohort (see Supplemental Table 1E for number (%) of missing data per variable).

| Cohort (country)                      | Age, years | Gestational age*, (weeks) | BMI, (kg/m <sup>2</sup> ) | Parity      |             |             |            | Smoking     |             | Ethnicity   |             |
|---------------------------------------|------------|---------------------------|---------------------------|-------------|-------------|-------------|------------|-------------|-------------|-------------|-------------|
|                                       |            |                           |                           | 0           | 1           | 2           | ≥3         | None/past   | Current     | Native      | Non-native  |
| <b>ABCD (Netherlands)</b>             | 31 (4.8)   | 13.0 (8.2-22.9)           | 23.9 (3.7)                | 2318 (57.6) | 1253 (31.2) | 329 (8.2)   | 121 (3.0)  | 3633 (90.4) | 384 ( 9.6)  | 2407 (59.9) | 1614 (40.1) |
| <b>ALSPAC (United Kingdom)</b>        | 28 (4.8)   | 11 (6-34)                 | 22.9 (3.7)                | 2153 (42.5) | 1643 (32.4) | 683 (13.5)  | 591 (11.7) | 3644 (75.8) | 1165 (24.2) | 5070 (100)  | -           |
| <b>Bliddal et al. (Denmark)</b>       | 31 (4.2)   | 11.3 (8.9-13.4)           | 22.8 (4.4)                | 485 (56.4)  | 291 (33.8)  | 84 (9.8)    | 0          | 768 (93.4)  | 54 ( 6.6)   | 860 (100)   | -           |
| <b>Chen et al. (China)</b>            | 27 (4.3)   | 31.1 (6.6-41.0)           | NA                        | 7137 (83.1) | 1379 (16.1) | 61 (0.7)    | 10 (0.1)   | 8570 (99.8) | 17 ( 0.2)   | 8587 (100)  | -           |
| <b>EFSOCH (United Kingdom)</b>        | 30 (5.2)   | 28 (28-28)                | 27.9 (4.6)                | 473 (49.5)  | 343 (35.8)  | 101 (10.5)  | 38 (4.0)   | 923 (99.8)  | 2 ( 0.2)    | 958 (100)   | -           |
| <b>Generation R (Netherlands)</b>     | 31 (5.0)   | 13.2 (9.6-17.6)           | 24.5 (4.4)                | 3412 (57.4) | 1773 (29.8) | 549 (9.2)   | 206 (3.5)  | 4330 (81.3) | 999 (18.7)  | 3263 (54.5) | 2723 (45.5) |
| <b>Ghafoor et al. (Pakistan)</b>      | 27 (6.4)   | 19 (15-31)                | NA                        | 620 (34.3)  | 475 (26.4)  | 388 (21.5)  | 319 (17.7) | NA          | NA          | 1803 (100)  | -           |
| <b>GIRONA 1 (Spain)</b>               | 31 (5.0)   | 26.7 (21.6-28.9)          | 26.8 (4.3)                | 147 (50.3)  | 145 (49.7)  | 0           | 0          | 161 (75.6)  | 52 (24.4)   | 326 (100)   | -           |
| <b>GIRONA 2 (Spain)</b>               | 31 (4.6)   | 25.8 (23.9-27.7)          | 26.4 (3.9)                | 192 (51.9)  | 132 (35.7)  | 46 (12.4)   | 0          | 310 (84.7)  | 56 (15.1)   | 370 (100)   | -           |
| <b>HAPPY (Netherlands)</b>            | 30 (3.7)   | 12 (12-12)                | 23.8 (3.9)                | 1008 (49.7) | 795 (39.2)  | 198 (9.8)   | 29 (1.4)   | 1721 (92.7) | 136 (7.3)   | 2067 (100)  | -           |
| <b>Hisada et al. (Japan)</b>          | 34 (4.7)   | 11 (7-15)                 | 20.6 (2.7)                | 87 (48.9)   | 74 (41.6)   | 16 (9.0)    | 1 (0.6)    | 157 (91.3)  | 15 ( 8.7)   | 179 (100)   | -           |
| <b>INMA (Spain)</b>                   | 31 (4.3)   | 13 (11-20)                | 23.5 (4.2)                | 1240 (56.4) | 806 (36.7)  | 133 (6.1)   | 18 (0.8)   | 1474 (68.4) | 681 (31.6)  | 2199 (100)  | -           |
| <b>Mosso et al. (Chile)</b>           | 25 (6.5)   | 8.4 (5-14)                | 26.0 (5.0)                | 288 (53.5)  | 147 (27.3)  | 103 (19.2)  | 0          | 474 (88.1)  | 64 (11.9)   | 538 (100)   | -           |
| <b>NFBC (Finland)</b>                 | 27 (5.4)   | 10 (6-20)                 | 22.2 (3.4)                | 1961 (33.8) | 1954 (33.7) | 1056 (18.2) | 835 (14.4) | 5586 (97.4) | 148 ( 2.6)  | 5827 (100)  | -           |
| <b>PIP Study (United Kingdom)</b>     | 30 (6.0)   | 13 (10-17)                | 26.1 (5.4)                | 1520 (45.2) | 1192 (35.5) | 422 (12.6)  | 226 (6.7)  | 2877 (85.5) | 487 (14.5)  | 3099 (92.1) | 265 (7.9)   |
| <b>Popova et al. (Russia)</b>         | 29 (4.6)   | 11 (6-14)                 | 23.8 (4.9)                | 278 (61.2)  | 138 (30.4)  | 34 (7.5)    | 4 (0.9)    | 344 (75.8)  | 110 (24.2)  | 454 (100)   | -           |
| <b>Rhea (Greece)</b>                  | 29 (4.9)   | 13 (9-23)                 | 25.0 (4.6)                | 333 (39.7)  | 334 (39.8)  | 138 (16.4)  | 34 (4.1)   | 666 (82.6)  | 140 (17.4)  | 856 (100)   | -           |
| <b>VIVA (United States)</b>           | 32 (4.7)   | 9.5 (6.9-16.7)            | 24.5 (5.1)                | 370 (49.9)  | 258 (34.8)  | 88 (11.9)   | 25 (3.4)   | 592 (80.1)  | 147 (19.9)  | 595 (80.3)  | 146 (19.7)  |
| <b>Western Australia</b>              | 31 (5.2)   | 11.1 (9.7-13.4)           | NA                        | NA          | -           | -           | -          | 2160 (90.3) | 233 ( 9.7)  | 2393 (100)  | -           |
| <b>Wijnen &amp; Pop (Netherlands)</b> | 30 (3.5)   | 12 (12-12)                | 25.5 (4.3)                | 567 (45.7)  | 673 (54.3)  | -           | -          | 1398 (90.4) | 148 (9.6)   | 1546 (100)  | -           |

Values are mean (SD), median (95% range) or n (valid %). NA: not available.

ABCD: Amsterdam Born Children and their Development; ALSPAC: Avon Longitudinal Study of Parents and Children; EFSOCH: The Exeter Family Study of Childhood Health; HAPPY: Holistic Approach to Pregnancy and the first Postpartum Year; INMA: Infancia y Medio Ambiente; NFBC: Northern Finland Birth Cohort; PIP Study: The Proteomics In Pre-eclampsia.

\*Gestational age at the time of blood sampling.

**Supplemental Table 1B.** Maternal thyroid function test results per cohort.

| Cohort (country)                      | TSH  |                 | FT4  |                  | TPOAb status*, N (%) |            | TgAb status*, N (%) |            |
|---------------------------------------|------|-----------------|------|------------------|----------------------|------------|---------------------|------------|
|                                       | N    | Median (IQR)    | N    | Median (IQR)     | Negative             | Positive   | Negative            | Positive   |
| <b>ABCD (Netherlands)</b>             | 3998 | 1.16 (0.8-1.8)  | 4020 | 9.48 (8.7-10.4)  | 3780 (94.0)          | 241 ( 6.0) | NA                  | NA         |
| <b>ALSPAC (United Kingdom)</b>        | 4908 | 1.02 (0.7-1.5)  | 4948 | 16.1 (14.7-17.7) | 4366 (87.8)          | 609 (12.2) | NA                  | NA         |
| <b>Bliddal et al. (Denmark)</b>       | 857  | 1.36 (0.9-2.0)  | 854  | 14.3 (13.2-15.6) | 732 (85.2)           | 127 (14.8) | 784 (91.2)          | 76 (8.8)   |
| <b>Chen et al. (China)</b>            | 8587 | 1.74 (1.2-2.6)  | 8587 | 9.04 (8.0-10.2)  | 8027 (94.8)          | 438 ( 5.2) | 8130 (95.8)         | 359 ( 4.2) |
| <b>EFSOCH (United Kingdom)</b>        | 955  | 1.87 (1.4-2.5)  | 957  | 12.0 (11.1-13.0) | 885 (92.9)           | 68 ( 7.1)  | NA                  | NA         |
| <b>Generation R (Netherlands)</b>     | 5595 | 1.34 (0.8-2.0)  | 5633 | 12.0 (10.6-13.6) | 5265 (94.4)          | 315 ( 5.6) | NA                  | NA         |
| <b>Ghafoor et al. (Pakistan)</b>      | 1803 | 1.69 (1.26-2.2) | 1803 | 17.4 (15.3-19.2) | 1645 (91.2)          | 158 (8.8)  | NA                  | NA         |
| <b>GIRONA 1 (Spain)</b>               | 326  | 1.81 (1.3-2.4)  | 326  | 11.3 (10.3-12.2) | 286 (89.4)           | 34 (10.6)  | NA                  | NA         |
| <b>GIRONA 2 (Spain)</b>               | 370  | 2.18 (1.6-2.9)  | 370  | 12.2 (11.3-13.2) | 299 (92.0)           | 26 ( 8.0)  | NA                  | NA         |
| <b>HAPPY (Netherlands)</b>            | 2067 | 1.46 (1.0-2.1)  | 2067 | 14.3 (13.2-15.4) | 1903 (92.1)          | 164 ( 7.9) | NA                  | NA         |
| <b>Hisada et al. (Japan)</b>          | 179  | 1.10 (0.6-1.8)  | NA   | -                | NA                   | NA         | NA                  | NA         |
| <b>INMA (Spain)</b>                   | 2199 | 1.26 (0.8- 1.8) | 2199 | 10.4 (9.5-11.4)  | NA                   | NA         | NA                  | NA         |
| <b>Mosso et al. (Chile)</b>           | 538  | 2.06 (1.3-3.0)  | 538  | 14.5 (13.2-15.8) | 482 (89.6)           | 56 (10.4)  | NA                  | NA         |
| <b>NFBC (Finland)</b>                 | 5803 | 1.21 (0.7-1.8)  | 5747 | 15.0 (13.7-16.6) | 5542 (95.3)          | 275 ( 4.7) | 5479 (95.2)         | 278 ( 4.8) |
| <b>PIP Study (United Kingdom)</b>     | 3358 | 1.30 (0.8-1.9)  | 3363 | 14.2 (13.1-15.5) | NA                   | NA         | NA                  | NA         |
| <b>Popova et al. (Russia)</b>         | 454  | 1.35 (0.7-2.1)  | 447  | 14.8 (13.4-16.4) | 399 (89.3)           | 48 (10.7)  | NA                  | NA         |
| <b>Rhea (Greece)</b>                  | 856  | 1.10 (0.7-1.6)  | 855  | 15.1 (14.0-16.7) | 777 (90.8)           | 79 ( 9.2)  | 810 (94.6)          | 46 ( 5.4)  |
| <b>VIVA (United States)</b>           | 732  | 1.20 (0.7-1.9)  | 741  | 2.1 (1. 9-2.3)** | 639 (86.2)           | 102 (13.8) | NA                  | NA         |
| <b>Western Australia</b>              | 2393 | 0.79 (0.5-1.2)  | 2393 | 13.0 (12.0-15.0) | 2142 (89.5)          | 251 (10.5) | 2089 (87.3)         | 304 (12.7) |
| <b>Wijnen &amp; Pop (Netherlands)</b> | 1546 | 1.10 (0.13-3.3) | 1546 | 15.9 (11.9-20.7) | 1409 (91.1)          | 137 (8.9)  | NA                  | NA         |

Values are median (IQR) or n (valid %). NA: not available.

ABCD: Amsterdam Born Children and their Development; ALSPAC: Avon Longitudinal Study of Parents and Children; EFSOCH: The Exeter Family Study of Childhood Health; HAPPY: Holistic Approach to Pregnancy and the first Postpartum Year; INMA: Infancia y Medio Ambiente; NFBC: Northern Finland Birth Cohort; PIP Study: The Proteomics In Pre-eclampsia.

\*According to cohort-specific assay manufacturer cut-offs.

\*\* Values are FT4 index, calculated from the total T4 and T3 uptake values (reference range, 1.0-4.0; doi: 10.4158/EP.14.1.33).

**Supplemental Table 1C.** Description of euthyroidism and thyroid function test abnormalities per cohort.

| Cohort (country)                      | N      | Euthyroid, N (%) | Subclinical hypothyroidism, N (%) | Subclinical hyperthyroidism, N (%) | Hyperthyroidism, N (%) | Hypothyroxinemia, N (%) | Hypothyroidism, N (%) |
|---------------------------------------|--------|------------------|-----------------------------------|------------------------------------|------------------------|-------------------------|-----------------------|
| <b>ABCD (Netherlands)</b>             | 3998   | 3662 (91.1)      | 131 (3.24)                        | 56 ( 1.38)                         | 45 (1.11)              | 83 ( 2.05)              | 21 (0.52)             |
| <b>ALSPAC (United Kingdom)</b>        | 4803   | 4376 (86.3)      | 184 (3.80)                        | 68 (1.41)                          | 41 (0.86)              | 102 (2.1)               | 32 (0.67)             |
| <b>Bliddal et al. (Denmark)</b>       | 854    | 791 (92.0)       | 21 ( 2.8)                         | 10 ( 1.2)                          | 8 ( 0.9)               | 21 ( 2.4)               | 3 (0.5)               |
| <b>Chen et al. (China)</b>            | 8587   | 7966 (92.8)      | 210 (2.4)                         | 145 (1.7)                          | 60 (0.7)               | 195 (2.3)               | 11 (0.1)              |
| <b>EFSOCH (United Kingdom)</b>        | 954    | 877 (91.5)       | 30 ( 3.1)                         | 18 ( 1.9)                          | 5 ( 0.5)               | 22 ( 2.3)               | 2 (0.2)               |
| <b>Generation R (Netherlands)</b>     | 5554   | 5093 (85.1)      | 176 (3.2)                         | 80 (1.4)                           | 54 (1.0)               | 137 (2.5)               | 15 (0.3)              |
| <b>Ghafoor et al. (Pakistan)</b>      | 1803   | 1690 (93.7)      | 29 ( 1.6)                         | 33 ( 1.8)                          | 9 ( 0.5)               | 38 ( 2.1)               | 5 (0.3)               |
| <b>GIRONA 1 (Spain)</b>               | 326    | 299 (91.7)       | 8 ( 2.4)                          | 7 ( 2.1)                           | 1 ( 0.3)               | 10 ( 3.1)               | 1 (0.3)               |
| <b>GIRONA 2 (Spain)</b>               | 370    | 370 (100)        | 0 (0)                             | 0 (0)                              | 0 (0)                  | 0 (0)                   | 0 (0)                 |
| <b>HAPPY (Netherlands)</b>            | 2067   | 1902 (92.0)      | 66 ( 3.2)                         | 27 ( 1.4)                          | 17 (0.8)               | 50 ( 2.4)               | 5 (0.2)               |
| <b>Hisada et al. (Japan)*</b>         | NA     | NA               | NA                                | NA                                 | NA                     | NA                      | NA                    |
| <b>INMA (Spain)*</b>                  | NA     | NA               | NA                                | NA                                 | NA                     | NA                      | NA                    |
| <b>Mosso et al. (Chile)</b>           | 538    | 488 (90.7)       | 19 ( 3.3)                         | 4 ( 0.7)                           | 9 ( 1.6)               | 13 ( 2.3)               | 5 (1.1)               |
| <b>NFBC (Finland)</b>                 | 5736   | 5248 (90.1)      | 188 (3.3)                         | 107 (1.9)                          | 31 ( 0.5)              | 128 (2.2)               | 34 (0.6)              |
| <b>PIP Study (United Kingdom)*</b>    | NA     | NA               | NA                                | NA                                 | NA                     | NA                      | NA                    |
| <b>Popova et al. (Russia)</b>         | 447    | 412 (90.7)       | 12 ( 2.7)                         | 8 ( 1.8)                           | 3 ( 0.7)               | 10 ( 2.2)               | 2 (0.4)               |
| <b>Rhea (Greece)</b>                  | 855    | 791 (92.4)       | 25 ( 3.0)                         | 9 ( 1.0)                           | 11 ( 1.2)              | 19 ( 2.2)               | 0 (0)                 |
| <b>VIVA (United States)</b>           | 732    | 674 (91.0)       | 31 ( 4.2)                         | 7 ( 1.0)                           | 7 (1.0)                | 10 (1.0)                | 3 (0.4)               |
| <b>Western Australia</b>              | 2393   | 2199 (91.9)      | 92 ( 3.8)                         | 9 ( 0.4)                           | 24 ( 1.0)              | 56 ( 2.3)               | 13 (0.5)              |
| <b>Wijnen &amp; Pop (Netherlands)</b> | 1546   | 1410 (91.2)      | 54 (3.5)                          | 29 (1.9)                           | 11 (0.7)               | 35 (2.3)                | 7 (0.5)               |
| <b>Total</b>                          | 41,564 | 38,248 (92.0)    | 1,275 (3.06)                      | 617 (1.48)                         | 336 (0.80)             | 929 (2.21)              | 159 (0.37)            |

Values are n (valid %). NA: not available.

ABCD: Amsterdam Born Children and their Development; ALSPAC: Avon Longitudinal Study of Parents and Children; EFSOCH: The Exeter Family Study of Childhood Health; HAPPY: Holistic Approach to Pregnancy and the first Postpartum Year; INMA: Infancia y Medio Ambiente; NFBC: Northern Finland Birth Cohort; PIP Study: The Proteomics In Pre-eclampsia.

\*Cohorts marked as NA did not have data on TPOAb and were not included in the analysis of thyroid function tests abnormalities.

**Supplemental Table 1D.** Description of pregnancy characteristics per cohort.

| Cohort (Country)                      | N    | Birth weight (grams) | Low birth weight, N (%) | Macrosomia, N(%) | Child sex, N (%)* |             |
|---------------------------------------|------|----------------------|-------------------------|------------------|-------------------|-------------|
|                                       |      |                      |                         |                  | Female            | Male        |
| <b>ABCD (Netherlands)</b>             | 4021 | 3450 (578)           | 176 (4.4)               | 559 (13.9)       | 2062 (51.3)       | 1959 (48.7) |
| <b>ALSPAC (United Kingdom)</b>        | 5070 | 3431 (525)           | 179 (3.5)               | 621 (12.2)       | 2457 (48.5)       | 2613 (51.5) |
| <b>Bliddal et al. (Denmark)</b>       | 860  | 3544 (542)           | 25 (2.9)                | 148 (17.2)       | NA                | NA          |
| <b>Chen et al. (China)</b>            | 8587 | 3338 (433)           | 187 (2.2)               | 466 (5.4)        | NA                | NA          |
| <b>EFSOCH (United Kingdom)</b>        | 958  | 3453 (522)           | 34 (3.5)                | 127 (13.3)       | 465 (48.5)        | 493 (51.4)  |
| <b>Generation R (Netherlands)</b>     | 5986 | 3416 (563)           | 297 (5.0)               | 782 (13.1)       | 2969 (49.6)       | 3017 (50.4) |
| <b>Ghafoor et al. (Pakistan)</b>      | 1803 | 2952 (571)           | 212 (11.8)              | 20 ( 1.1)        | 943 (52.3)        | 860 (47.7)  |
| <b>GIRONA 1 (Spain)</b>               | 326  | 3276 (464)           | 16 (4.9)                | 17 (5.2)         | 149 (45.7)        | 177 (54.3)  |
| <b>GIRONA 2 (Spain)</b>               | 370  | 3296 (481)           | 15 (4.1)                | 25 (6.8)         | 185 (50.0)        | 185 (50.0)  |
| <b>HAPPY (Netherlands)</b>            | 2067 | 3452 (530)           | 69 (3.3)                | 278 (13.4)       | 1050 (50.8)       | 1017 (49.2) |
| <b>Hisada et al. (Japan)</b>          | 179  | 2975 (362)           | 12 (6.7)                | 0 (0)            | 90 (50.3)         | 89 (49.7)   |
| <b>INMA (Spain)</b>                   | 2199 | 3259 (470)           | 111 (5.0)               | 106 (4.8)        | 1058 (48.1)       | 1141 (51.9) |
| <b>Mosso et al. (Chile)</b>           | 538  | 3355 (513)           | 28 (5.2)                | 51 (9.5)         | 259 (48.1)        | 279 (51.9)  |
| <b>NFBC (Finland)</b>                 | 5827 | 3576 (526)           | 158 (2.7)               | 1090 (18.7)      | 2825 (48.5)       | 3002 (51.5) |
| <b>PIP Study (United Kingdom)</b>     | 3364 | 3421 (556)           | 166 (4.9)               | 468 (13.9)       | 1699 (50.5)       | 1665 (49.5) |
| <b>Popova et al. (Russia)</b>         | 454  | 3477 (528)           | 18 (4.0)                | 55 (12.1)        | 205 (45.2)        | 249 (54.8)  |
| <b>Rhea (Greece)</b>                  | 856  | 3188 (447)           | 43 (5.0)                | 32 (3.7)         | 418 (48.8)        | 438 (51.2)  |
| <b>VIVA (United States)</b>           | 741  | 3519 (556)           | 26 (3.5)                | 127 (17.1)       | 361 (48.7)        | 380 (51.3)  |
| <b>Western Australia</b>              | 2393 | 3408 (523)           | 95 (4.0)                | 264 (11.0)       | 1144 (47.8)       | 1249 (52.2) |
| <b>Wijnen &amp; Pop (Netherlands)</b> | 1546 | 3470 (568)           | 66 (4.3)                | 224 (14.5)       | 716 (46.3)        | 830 (53.7)  |

Values are mean (SD) or n (valid %). NA: not available.

ABCD: Amsterdam Born Children and their Development; ALSPAC: Avon Longitudinal Study of Parents and Children; EFSOCH: The Exeter Family Study of Childhood Health; HAPPY: Holistic Approach to Pregnancy and the first Postpartum Year; INMA: Infancia y Medio Ambiente; NFBC: Northern Finland Birth Cohort; PIP Study: The Proteomics In Pre-eclampsia.

Per definition, the percentage of small or large for gestational age per cohort was 10%.

\*For number (%) of missing on child sex see Supplemental Table 1E.

**Supplemental Table 1E.** Number (%) of missing data of covariates per cohort.

| Cohort (country)                      | N      | Maternal age | Gestational age at the time of blood sampling | Parity      | Smoking     | BMI           | Child sex   |
|---------------------------------------|--------|--------------|-----------------------------------------------|-------------|-------------|---------------|-------------|
| <b>ABCD (Netherlands)</b>             | 4021   | 93 (2.3)     | 19 (0.5)                                      | 0           | 4 (0.1)     | 922 (22.9)    | 0           |
| <b>ALSPAC (United Kingdom)</b>        | 5070   | 0            | 0                                             | 0           | 261 (5.1)   | 791 (15.6)    | 0           |
| <b>Bliddal et al. (Denmark)</b>       | 860    | 0            | 0                                             | 0           | 38 (4.4)    | 41 (4.7)      | NA          |
| <b>Chen et al. (China)</b>            | 8587   | 20 (0.2)     | 0                                             | 0           | 0           | NA            | NA          |
| <b>EFSOCH (United Kingdom)</b>        | 958    | 0            | 0                                             | 3 (0.3)     | 33 (3.4)    | 5 (0.5)       | 0           |
| <b>Generation R (Netherlands)</b>     | 5986   | 0            | 20 (0.3)                                      | 46 (0.8)    | 657 (11.0)  | 34 (0.6)      | 0           |
| <b>Ghafoor et al. (Pakistan)</b>      | 1803   | 4 (0.2)      | 0                                             | 1 (0.1)     | NA          | NA            | 0           |
| <b>GIRONA 1 (Spain)</b>               | 326    | 6 (1.8)      | 65 (20.2)                                     | 34 (10.4)   | 113 (34.7)  | 60 (18.4)     | 0           |
| <b>GIRONA 2 (Spain)</b>               | 370    | 0            | 2 (0.5)                                       | 0           | 4 (1.1)     | 2 (0.5)       | 0           |
| <b>HAPPY (Netherlands)</b>            | 2067   | 0            | 0                                             | 37 (1.8)    | 210 (10.2)  | 78 (3.7)      | 0           |
| <b>Hisada et al. (Japan)</b>          | 179    | 2 (1.1)      | 31 (17.1)                                     | 1 (0.6)     | 7 (3.9)     | 1 (0.6)       | 0           |
| <b>INMA (Spain)</b>                   | 2199   | 1 (0.0)      | 1 (0.0)                                       | 2 (0.1)     | 44 (2.0)    | 0             | 0           |
| <b>Mosso et al. (Chile)</b>           | 538    | 0            | 0                                             | 0           | 0           | 1 (0.2)       | 0           |
| <b>NFBC (Finland)</b>                 | 5827   | 0            | 15 (0.3)                                      | 21 (0.4)    | 93 (1.6)    | 142 (2.4)     | 0           |
| <b>PIP Study (United Kingdom)</b>     | 3364   | 9 (0.3)      | 13 (0.4)                                      | 4 (0.1)     | 0           | 317 (9.4)     | 0           |
| <b>Popova et al. (Russia)</b>         | 454    | 1 (0.2)      | 0                                             | 0           | 0           | 0             | 0           |
| <b>Rhea (Greece)</b>                  | 856    | 8 (0.9)      | 0                                             | 17 (2.0)    | 50 (5.8)    | 43 (6.7)      | 0           |
| <b>VIVA (United States)</b>           | 741    | 3 (0.4)      | 0                                             | 0           | 2 (0.3)     | 2 (0.3)       | 0           |
| <b>Western Australia</b>              | 2393   | 0            | 0                                             | NA          | 0           | NA            | 0           |
| <b>Wijnen &amp; Pop (Netherlands)</b> | 1546   | 337 (21.7)   | 0                                             | 306 (19.8)  | 0           | 337 (21.7)    | 0           |
| <b>Total</b>                          | 48,145 | 484 (1.0%)   | 166 (0.34%)                                   | 2865 (6.0%) | 3319 (6.9%) | 15559 (32.3%) | 9447 (19.6) |

Values are n (valid %).

NA: not available (100% missing).

ABCD: Amsterdam Born Children and their Development; ALSPAC: Avon Longitudinal Study of Parents and Children; EFSOCH: The Exeter Family Study of Childhood Health; HAPPY: Holistic Approach to Pregnancy and the first Postpartum Year; INMA: Infancia y Medio Ambiente; NFBC: Northern Finland Birth Cohort; PIP Study: The Proteomics In Pre-eclampsia.

**Supplemental Table 1F.** Overview of iodine status of the included cohorts.

| <b>Cohort</b>            | <b>Country</b> | <b>Iodine status</b> | <b>Reference</b>                                                                                          | <b>Iodine status based on data from the same cohort?</b> |
|--------------------------|----------------|----------------------|-----------------------------------------------------------------------------------------------------------|----------------------------------------------------------|
| <b>ABCD</b>              | Netherlands    | Sufficient           | <a href="https://doi.org/10.1111/cen.12321">https://doi.org/10.1111/cen.12321</a>                         | No                                                       |
| <b>ALSPAC</b>            | United Kingdom | Deficient            | <a href="https://doi.org/10.1016/S0140-6736(13)60436-5">https://doi.org/10.1016/S0140-6736(13)60436-5</a> | <b>Yes</b>                                               |
| <b>Bliddal et al.</b>    | Denmark        | Mild deficiency      | <a href="https://doi.org/10.1016/j.jtemb.2014.11.004">https://doi.org/10.1016/j.jtemb.2014.11.004</a>     | No                                                       |
| <b>Chen et al.</b>       | China          | Deficient            | <a href="https://doi.org/10.1007/s12011-018-1257-6">https://doi.org/10.1007/s12011-018-1257-6</a>         | No                                                       |
| <b>EFSOCH</b>            | United Kingdom | Deficient            | <a href="https://doi.org/10.1111/cen.13268">https://doi.org/10.1111/cen.13268</a>                         | <b>Yes</b>                                               |
| <b>Generation R</b>      | Netherlands    | Sufficient           | <a href="https://doi.org/10.1111/cen.12321">https://doi.org/10.1111/cen.12321</a>                         | <b>Yes</b>                                               |
| <b>Ghafoor et al.</b>    | Pakistan       | Deficient            | <a href="https://doi.org/10.1089/thy.2017.0267">https://doi.org/10.1089/thy.2017.0267</a>                 | No                                                       |
| <b>GIRONA 1&amp;2</b>    | Spain          | Sufficient           | <a href="https://doi.org/10.1186/s12884-017-1423-4">https://doi.org/10.1186/s12884-017-1423-4</a>         | No                                                       |
| <b>HAPPY</b>             | Netherlands    | Sufficient           | <a href="https://doi.org/10.1111/cen.12321">https://doi.org/10.1111/cen.12321</a>                         | No                                                       |
| <b>Hisada et al.</b>     | Japan          | Sufficient           | <a href="https://doi.org/10.1210/jc.2011-2180">https://doi.org/10.1210/jc.2011-2180</a>                   | No                                                       |
| <b>INMA</b>              | Spain          | Deficient            | <a href="https://doi.org/10.1136/jech.2009.092593">https://doi.org/10.1136/jech.2009.092593</a>           | <b>Yes</b>                                               |
| <b>Mosso et al.</b>      | Chile          | Sufficient           | <a href="https://doi.org/10.3803/EnM.2018.33.4.466">https://doi.org/10.3803/EnM.2018.33.4.466</a>         | <b>Yes</b>                                               |
| <b>NFBC</b>              | Finland        | Sufficient           | <a href="https://doi.org/10.1089/thy.2010.0337">https://doi.org/10.1089/thy.2010.0337</a>                 | No                                                       |
| <b>PIP Study</b>         | United Kingdom | Deficient            | <a href="https://doi.org/10.1007/s10653-015-9682-3">https://doi.org/10.1007/s10653-015-9682-3</a>         | No                                                       |
| <b>Popova et al.</b>     | Russia         | Mild deficiency      | <a href="https://doi.org/10.1097/MED.0b013e328357271a">https://doi.org/10.1097/MED.0b013e328357271a</a>   | No                                                       |
| <b>Rhea</b>              | Greece         | Sufficient           | <a href="https://doi.org/10.1016/S0140-6736(03)14037-8">https://doi.org/10.1016/S0140-6736(03)14037-8</a> | No                                                       |
| <b>VIVA</b>              | United States  | Deficient            | <a href="https://doi.org/10.1089/thy.2012.0217">https://doi.org/10.1089/thy.2012.0217</a>                 | No                                                       |
| <b>Western Australia</b> | Australia      | Sufficient           | <a href="https://doi.org/10.1210/jc.2014-1918">https://doi.org/10.1210/jc.2014-1918</a>                   | No                                                       |
| <b>Wijnen &amp; Pop</b>  | Netherlands    | Sufficient           | <a href="https://doi.org/10.1530/eje.0.1440595">https://doi.org/10.1530/eje.0.1440595</a>                 | No                                                       |

ABCD: Amsterdam Born Children and their Development; ALSPAC: Avon Longitudinal Study of Parents and Children; EFSOCH: The Exeter Family Study of Childhood Health; HAPPY: Holistic Approach to Pregnancy and the first Postpartum Year; INMA: Infancia y Medio Ambiente; NFBC: Northern Finland Birth Cohort; PIP Study: The Proteomics In Pre-eclampsia.

**Supplemental Table 2.** Date and place of data collection for the included cohorts.

| <b>Cohort</b>            | <b>Date</b>                          | <b>Place</b>                                                                   |
|--------------------------|--------------------------------------|--------------------------------------------------------------------------------|
| <b>ABCD</b>              | between January 2003 and March 2004  | Amsterdam, the Netherlands                                                     |
| <b>ALSPAC</b>            | between April 1991 and December 1992 | former Avon county, UK                                                         |
| <b>Bliddal et al.</b>    | throughout 2008                      | Copenhagen, Denmark                                                            |
| <b>Chen et al.</b>       | February 2009 until February 2012    | Wenzhou, China                                                                 |
| <b>EFSOCH</b>            | throughout 2006                      | Exeter, UK                                                                     |
| <b>Generation R</b>      | April 2002 until January 2006        | Rotterdam, the Netherlands                                                     |
| <b>Ghafoor et al.</b>    | July 2000 to July 2002               | Lahore, Pakistan                                                               |
| <b>GIRONA 1&amp;2</b>    | May 2008 until May 2010              | Girona, Catalonia, Spain                                                       |
| <b>HAPPY</b>             | throughout 2012                      | South-East Brabant, the Netherlands                                            |
| <b>Hisada et al.</b>     | 2009 to 2011                         | Tokyo, Japan                                                                   |
| <b>INMA</b>              | between 2003 and 2008                | Valencia, Sabadell (Catalonia), Asturias, and Gipuzkoa (Basque Country), Spain |
| <b>Mosso et al.</b>      | the first half of 2014               | Santiago, Chile                                                                |
| <b>NFBC</b>              | July 1, 1985, until June 30, 1986    | northernmost provinces of Finland                                              |
| <b>PIP Study</b>         | between 2007 and 2010                | West of Scotland, UK                                                           |
| <b>Popova et al.</b>     | January 2012 to December 2016        | St. Petersburg, Russia                                                         |
| <b>Rhea</b>              | starting February 2007               | Heraklion, Crete, Greece                                                       |
| <b>VIVA</b>              | between 1999 and 2002                | Eastern Massachusetts, USA                                                     |
| <b>Western Australia</b> | October 2006 until February 2007     | Western Australia, Australia                                                   |
| <b>Wijnen &amp; Pop</b>  | 2002 to 2004                         | Eindhoven, the Netherlands                                                     |

ABCD: Amsterdam Born Children and their Development; ALSPAC: Avon Longitudinal Study of Parents and Children; EFSOCH: The Exeter Family Study of Childhood Health; HAPPY: Holistic Approach to Pregnancy and the first Postpartum Year; INMA: Infancia y Medio Ambiente; NFBC: Northern Finland Birth Cohort; PIP Study: The Proteomics In Pre-eclampsia.



**Supplemental Table 3.** Cohort-specific cut-offs of TSH and FT4 for defining thyroid function test abnormalities.

| Cohort            | TSH (mU/L)                   |                               | FT4 (pmol/L)                 |                               |
|-------------------|------------------------------|-------------------------------|------------------------------|-------------------------------|
|                   | 2.5 <sup>th</sup> percentile | 97.5 <sup>th</sup> percentile | 2.5 <sup>th</sup> percentile | 97.5 <sup>th</sup> percentile |
| ABCD              | 0.12                         | 3.09                          | 7.19                         | 12.6                          |
| ALSPAC            | 0.08                         | 2.59                          | 12.4                         | 22.4                          |
| Bliddal et al.    | 0.10                         | 3.69                          | 11.4                         | 19.2                          |
| Chen et al.       | 0.37                         | 5.37                          | 6.19                         | 13.2                          |
| EFSOCH            | 0.63                         | 4.46                          | 9.35                         | 15.7                          |
| Generation R      | 0.03                         | 4.04                          | 10.4                         | 22.0                          |
| Ghafoor et al.    | 0.48                         | 3.00                          | 11.4                         | 23.2                          |
| GIRONA 1          | 0.43                         | 4.26                          | 9.00                         | 15.1                          |
| GIRONA 2          | 0.58                         | 4.62                          | 9.45                         | 15.8                          |
| HAPPY             | 0.23                         | 4.00                          | 11.5                         | 18.0                          |
| Hisada et al.     | NA                           | NA                            | NA                           | NA                            |
| INMA              | NA                           | NA                            | NA                           | NA                            |
| Mosso et al.      | 0.10                         | 6.00                          | 11.0                         | 19.0                          |
| NFBC              | 0.09                         | 3.82                          | 11.5                         | 22.6                          |
| PIP Study         | NA                           | NA                            | NA                           | NA                            |
| Popova et al.     | 0.07                         | 4.06                          | 11.7                         | 20.2                          |
| RHEA              | 0.11                         | 3.21                          | 11.2                         | 20.1                          |
| VIVA              | 0.06                         | 3.66                          | 1.5*                         | 3.0*                          |
| Western Australia | 0.02                         | 2.25                          | 11.0                         | 18.0                          |
| Wijnen & Pop      | 0.14                         | 2.90                          | 12.0                         | 20.6                          |

Lower and upper percentiles of TSH and FT4 were defined after exclusion of TPOAb positive participants. Cohorts marked as NA did not have data on TPOAb and were not included in the analysis of defining thyroid function tests abnormalities.

ABCD: Amsterdam Born Children and their Development; ALSPAC: Avon Longitudinal Study of Parents and Children; EFSOCH: The Exeter Family Study of Childhood Health; HAPPY: Holistic Approach to Pregnancy and the first Postpartum Year; INMA: Infancia y Medio Ambiente; NFBC: Northern Finland Birth Cohort; PIP Study: The Proteomics In Pre-eclampsia.

\* Values are FT4 index, calculated from the total T4 and T3 uptake values (reference range, 1.0-4.0; doi: 10.4158/EP.14.1.33).

**Supplemental Table 4.** Comparison of TSH and FT4 concentrations or TPOAb positivity between women with or without data on birth weight.

|                                | <b>N</b> | <b>BW available</b> | <b>N</b> | <b>BW missing</b> | <b>P value</b> |
|--------------------------------|----------|---------------------|----------|-------------------|----------------|
| <b>TSH (Z-score)</b>           | 47,071 * | 0.001 (0.004)       | 339      | -0.01 (0.05)      | 0.82           |
| <b>FT4 (Z-score)</b>           | 47,225*  | -0.001 (0.004)      | 344      | -0.01 (0.05)      | 0.79           |
|                                |          | <b>BW available</b> | <b>N</b> | <b>BW missing</b> | <b>P value</b> |
| <b>TPOAb positivity, N (%)</b> | 41,706   | 3128 (7.5)          | 317      | 40 (12.6)         | 0.0005         |

Data are mean (standard error of mean) or N (percentage), as appropriate. BW; birth weight. P values are calculated using Student's t-test or Chi-square test.

\* After exclusion of outliers of TSH (n=453) or FT4 (n=169).

**Supplemental Table 5.** Association of thyroid antibodies with birth weight.

|                         | Small for Gestational Age |                     |                | Large for Gestational Age |                     |                | Birth weight (grams) |                |
|-------------------------|---------------------------|---------------------|----------------|---------------------------|---------------------|----------------|----------------------|----------------|
|                         | N of events/<br>Total (%) | OR (95% CI)         | <i>P</i> value | N of events/<br>Total (%) | OR (95% CI)         | <i>P</i> value | Beta (95% CI)        | <i>P</i> value |
| <b>TPOAb negative</b>   | 3,852/38,578 (10.0)       | Ref                 | Ref            | 3,816/38,578 (9.9)        | Ref                 | Ref            | Ref                  | Ref            |
| <b>TPOAb Positivity</b> | 279/3,128 (8.9)           | 0.92 (0.81 to 1.05) | 0.25           | 314/3,128 (10.0)          | 0.96 (0.84 to 1.08) | 0.52           | 4.1 (-11 to 19)      | 0.60           |
| <b>TgAb negative</b>    | 1,737/17,292 (10.0)       | Ref                 | Ref            | 1,699/17,292 (9.8)        | Ref                 | Ref            | Ref                  | Ref            |
| <b>TgAb positivity</b>  | 85/1,063 (8.0)            | 0.82 (0.65 to 1.03) | 0.10           | 117/1,063 (11.0)          | 1.07 (0.88 to 1.31) | 0.46           | 21.8 (-4.1 to 47)    | 0.099          |

Table shows the association of thyroid antibodies with small for gestational age (SGA), large for gestational age (LGA) and continuous birth weight (grams). All analyses were adjusted for maternal age, BMI, ethnicity, smoking, parity, gestational age at blood sampling and fetal sex and gestational age at birth.

**Supplemental Table 6A.** P values for the interaction terms of thyroid function test abnormalities as well as thyroid function tests with relevant variables in association with main birth weight.

|                         | <b>Subclinical<br/>hypothyroidism</b> | <b>Subclinical<br/>hyperthyroidism</b> | <b>Overt<br/>hyperthyroidism</b> | <b>Isolated<br/>hypothyroxinemia</b> | <b>TSH</b>  | <b>FT4</b>    | <b>TPOAb</b> |
|-------------------------|---------------------------------------|----------------------------------------|----------------------------------|--------------------------------------|-------------|---------------|--------------|
| <b>Gestational age*</b> | <b>0.072</b>                          | 0.76                                   | 0.95                             | 0.22                                 | 0.44        | <b>0.0002</b> | 0.30         |
| <b>Fetal sex</b>        | 0.56                                  | 0.75                                   | 0.64                             | 0.35                                 | 0.28        | 0.28          | 0.91         |
| <b>Maternal age</b>     | 0.51                                  | 0.75                                   | 0.29                             | 0.34                                 | <b>0.11</b> | <b>0.078</b>  | 0.53         |
| <b>BMI</b>              | 0.80                                  | 0.86                                   | 0.58                             | 0.28                                 | 0.65        | <b>0.003</b>  | 0.63         |
| <b>Smoking</b>          | 0.32                                  | 0.31                                   | 0.86                             | 0.26                                 | 0.38        | 0.28          | 0.17         |

Table shows P values for product interaction terms of thyroid function test abnormalities as well as thyroid function tests with gestational age at the time of sampling, fetal sex, maternal age, maternal BMI and smoking status in association with birth weight (grams) in multivariable regression models adjusted for maternal age, BMI, ethnicity, smoking, parity, gestational age at blood sampling and fetal sex and gestational age at birth. For *P* values<0.15 stratified analysis was performed.

\* Denotes gestational age at the time of maternal blood sampling.

**Supplemental Table 6B.** Association of FT4, subclinical hypothyroidism or isolated hypothyroxinemia with birth weight outcomes according to trimesters of pregnancy.

|                                   | <b>1<sup>st</sup> trimester</b><br><b>N=15,712</b> | <b>2<sup>nd</sup> trimester</b><br><b>N=23,729</b> | <b>3<sup>rd</sup> trimester</b><br><b>N=7,784</b> |                          |
|-----------------------------------|----------------------------------------------------|----------------------------------------------------|---------------------------------------------------|--------------------------|
|                                   | Beta (95% CI)                                      | Beta (95% CI)                                      | Beta (95% CI)                                     | <i>P</i> for interaction |
| <b>FT4 (Z-score)</b>              | -13.1 (-20 to -6.2)                                | -21.6 (-27 to -16)                                 | -36.3 (-46 to -26)                                | 0.0002                   |
|                                   | <b>1<sup>st</sup> trimester</b><br><b>N*=466</b>   | <b>2<sup>nd</sup> trimester</b><br><b>N*=546</b>   | <b>3<sup>rd</sup> trimester</b><br><b>N*=263</b>  |                          |
|                                   | Beta (95% CI)                                      | Beta (95% CI)                                      | Beta (95% CI)                                     | <i>P</i> for interaction |
| <b>Subclinical hypothyroidism</b> | -20.3 (-60 to 19)                                  | -33.4 (-70 to 3.0)                                 | -74.8 (-124 to -25)                               | 0.072                    |

Table shows the association of FT4 Z-scores and subclinical hypothyroidism with birth weight according to trimesters of pregnancy. All analyses are adjusted for maternal age, BMI, ethnicity, smoking, parity, gestational age at blood sampling and fetal sex and gestational age at birth. Trimester of pregnancy were defined as <week 12 weeks, weeks 12-25 and >week 25 of pregnancy.

\* Versus euthyroid population. N is the number of participants with subclinical hypothyroidism. N of euthyroid participants per trimester is 13594, 17451 and 7203, respectively.

**Supplemental Table 6C.** Association of TSH and FT4 with birth weight according to maternal age (P for interaction=0.11 and 0.078, respectively).

|                      | <b>Maternal age &lt;30 years</b> | <b>Maternal age ≥30 years</b>  |
|----------------------|----------------------------------|--------------------------------|
|                      | Beta (95% CI)                    | Beta (95% CI)                  |
| <b>TSH (Z-score)</b> | -2.5 (7.8 to 2.9) [N= 25,526]    | -8.4 (-14 to -2.5) [N= 21,545] |
| <b>FT4 (Z-score)</b> | -22.2 (-27 to -17) [N= 25,621]   | -19.0 (-25 to -13) [N= 21,604] |
|                      | <b>Maternal age &lt;35 years</b> | <b>Maternal age ≥35 years</b>  |
|                      | Beta (95% CI)                    | Beta (95% CI)                  |
| <b>TSH (Z-score)</b> | -3.7 (-8 to 0.5) [N= 40,174]     | -15.2 (-25 to -4.9) [N= 6,897] |
| <b>FT4 (Z-score)</b> | -22.5 (-26 to -18) [N=40,333]    | -11.9 (-22 to -1.4) [N=6,892]  |
|                      | <b>Maternal age &lt;40 years</b> | <b>Maternal age ≥40 years</b>  |
|                      | Beta (95% CI)                    | Beta (95% CI)                  |
| <b>TSH (Z-score)</b> | -5.8 (-9.8 to -1.8) [N= 46,166]  | -9.5 (-38 to 19) [N=905]       |
| <b>FT4 (Z-score)</b> | -21.4 (-25 to -17) [N=46,332]    | -7.0 (-36 to 22) [N=893]       |

Table shows the association of TSH and FT4 Z-scores with birth weight according maternal age. All analyses are adjusted for maternal age, BMI, ethnicity, smoking, parity, gestational age at blood sampling and fetal sex and gestational age at birth.

**Supplemental Table 6D.** Association of FT4 with birth weight according to maternal body mass index (BMI).

|                                                      | <b>BMI&lt;18 kg/m<sup>2</sup></b><br><b>N=3,714</b> | <b>18≤BMI&lt;25 kg/m<sup>2</sup></b><br><b>N= 26,974</b> | <b>25≤BMI&lt;30 kg/m<sup>2</sup></b><br><b>N= 13,346</b> | <b>BMI≥30 kg/m<sup>2</sup></b><br><b>N=3,191</b> |                          |
|------------------------------------------------------|-----------------------------------------------------|----------------------------------------------------------|----------------------------------------------------------|--------------------------------------------------|--------------------------|
| <b>All cohorts*</b><br><b>N=47,225</b>               | Beta (95% CI)                                       | Beta (95% CI)                                            | Beta (95% CI)                                            | Beta (95% CI)                                    | <i>P</i> for interaction |
| <b>FT4 (Z-score)</b>                                 | -26.3 (-47 to -4.7)                                 | -12.6 (-18 to -7.3)                                      | -27.7 (-35 to -20.1)                                     | -38.3 (-54 to -21)                               | 0.003                    |
|                                                      | <b>BMI&lt;18 kg/m<sup>2</sup></b><br><b>N=1,094</b> | <b>18≤BMI&lt;25 kg/m<sup>2</sup></b><br><b>N= 21,934</b> | <b>25≤BMI&lt;30 kg/m<sup>2</sup></b><br><b>N= 8,257</b>  | <b>BMI≥30 kg/m<sup>2</sup></b><br><b>N=3,191</b> |                          |
| <b>Cohorts with data on BMI**</b><br><b>N=34,476</b> | Beta (95% CI)                                       | Beta (95% CI)                                            | Beta (95% CI)                                            | Beta (95% CI)                                    | <i>P</i> for interaction |
| <b>FT4 (Z-score)</b>                                 | -26.5 (-53 to 0.8)                                  | -9.6 (-15 to -3.8)                                       | -24.4 (-34 to -14)                                       | -38.3 (-54 to -21)                               | 0.006                    |

Table shows the association of FT4 Z-scores with birth weight according to maternal body mass index (BMI). All analyses are adjusted for maternal age, BMI, ethnicity, smoking, parity, gestational age at blood sampling and fetal sex and gestational age at birth.

\* All participants from all cohort were included since missing data on BMI (systematically or case-wise) were imputed. N=169 outliers of FT4 were excluded.

\*\* As a sensitivity analysis, the following cohorts were not included in the analysis due to systematically missing data on BMI: Chen et al., Western Australia and Ghafoor et al.

**Supplemental Table 7.** Association of TSH, FT4 with birth weight according to TPOAb status.

| Birth weight    |               |                      |         |                |                     |       |                              |
|-----------------|---------------|----------------------|---------|----------------|---------------------|-------|------------------------------|
| TPOAb negative  |               |                      |         | TPOAb positive |                     |       | P for interaction with TPOAb |
| N               | Beta (95% CI) | P value              | N       | Beta (95% CI)  | P value             |       |                              |
| <i>Z-scores</i> |               |                      |         |                |                     |       |                              |
| <b>TSH</b>      | 38,021        | -4.7 (-9.2 to -0.16) | 0.042   | 3,080          | -17.5 (-32 to -2.5) | 0.022 | 0.106                        |
| <b>FT4</b>      | 37,960        | -21.1 (-26 to -17)   | <0.0001 | 3,058          | -10.2 (-25 to 4.2)  | 0.16  | 0.091                        |

Table shows the association of maternal TSH and FT4 (Z-scores) with continuous birth weight (grams) according to TPOAb status. All analyses were adjusted for maternal age, BMI, ethnicity, smoking, parity, gestational age at blood sampling and fetal sex and gestational age at birth.



**Supplemental Table 8.** Association of thyroid function test abnormalities as well as TSH and FT4 concentrations with low birth weight.

|                                            | LBW                  |                     |         | LBW at term*         |                     |         |
|--------------------------------------------|----------------------|---------------------|---------|----------------------|---------------------|---------|
|                                            | N of events/total(%) | OR (95% CI)         | P value | N of events/total(%) | OR (95% CI)         | P value |
| <i>Thyroid function test abnormalities</i> |                      |                     |         |                      |                     |         |
| <b>Euthyroid</b>                           | 1,456/38,248 (3.8)   | Ref                 | Ref     | 586/36,405 (1.6)     | Ref                 | Ref     |
| <b>Subclinical Hypothyroidism</b>          | 74/1,275 (5.8)       | 1.70 (1.24 to 2.33) | 0.0009  | 29/1,200 (2.4)       | 1.61 (1.08 to 2.39) | 0.017   |
| <b>Subclinical Hyperthyroidism</b>         | 28/617 (4.5)         | 0.99 (0.58 to 1.66) | 0.97    | 8/583 (1.4)          | 0.80 (0.39 to 1.66) | 0.56    |
| <b>Overt hyperthyroidism</b>               | 14/336 (4.2)         | 1.20 (0.61 to 2.36) | 0.58    | 8/323 (2.5)          | 1.42 (0.68 to 2.97) | 0.34    |
| <b>Isolated hypothyroxinemia</b>           | 36/929 (3.9)         | 0.62 (0.38 to 1.00) | 0.053   | 9/865 (1.0)          | 0.60 (0.30 to 1.17) | 0.14    |
| <i>Z-scores</i>                            |                      |                     |         |                      |                     |         |
| <b>TSH</b>                                 | 1,883/47,071 (4)     | 1.07 (1.00 to 1.14) | 0.022   | 789/44,796 (1.8)     | 1.09 (1.01 to 1.17) | 0.021   |
| <b>FT4</b>                                 | 1,888/47,225 (4)     | 1.14 (1.07 to 1.21) | <0.0001 | 788/44,931 (1.8)     | 1.14 (1.06 to 1.23) | 0.0002  |
| <b>TPOAb negative</b>                      | 1,435/38,578 (3.7)   | Ref                 | Ref     | 589/36,739 (1.6)     | Ref                 | Ref     |
| <b>TPOAb Positivity</b>                    | 177/3,128 (5.7)      | 1.31 (1.04 to 1.65) | 0.017   | 55/2,931 (1.9)       | 1.23 (0.92 to 1.64) | 0.16    |
| <b>TgAb negative</b>                       | 479/17,292 (2.8)     | Ref                 | Ref     | 184/16,528 (1.1)     | Ref                 | Ref     |
| <b>TgAb positivity</b>                     | 23/1,063 (2.2)       | 0.78 (0.47 to 1.30) | 0.35    | 7/1,018 (0.7)        | 0.59 (0.27 to 1.28) | 0.18    |

Table shows the association of maternal thyroid function test abnormalities with low birth weight (LBW) or macrosomia. All analyses were adjusted for maternal age, BMI, ethnicity, smoking, parity, gestational age at blood sampling, fetal sex and gestational age at birth.

\*Analysis limited to term births ( $\geq 37$  weeks).

**Supplemental Table 9.** Association of thyroid function test abnormalities as well as TSH and FT4 concentrations with macrosomia.

|                                            | N of events/total(%) | <b>Macrosomia</b>   |         |
|--------------------------------------------|----------------------|---------------------|---------|
|                                            |                      | OR (95% CI)         | P value |
| <i>Thyroid function test abnormalities</i> |                      |                     |         |
| <b>Euthyroid</b>                           | 4,724/ 38,248 (12.4) | Ref                 | Ref     |
| <b>Subclinical Hypothyroidism</b>          | 156/1,257 (12.2)     | 0.92 (0.77 to 1.11) | 0.41    |
| <b>Subclinical Hyperthyroidism</b>         | 86/617 (13.9)        | 1.14 (0.88 to 1.48) | 0.28    |
| <b>Overt hyperthyroidism</b>               | 33/336 (9.8)         | 0.89 (0.60 to 1.32) | 0.58    |
| <b>Isolated hypothyroxinemia</b>           | 121/929 (13.0)       | 1.08 (0.87 to 1.34) | 0.44    |
| <i>Z-scores</i>                            |                      |                     |         |
| <b>TSH</b>                                 | 5,740/47,071 (12.2)  | 0.96 (0.93 to 0.99) | 0.022   |
| <b>FT4</b>                                 | 5,764/47,225 (12.2)  | 0.93 (0.90 to 0.96) | <0.0001 |
| <b>TPOAb negative</b>                      | 4,814/38,578 (12.5)  | Ref                 | Ref     |
| <b>TPOAb Positivity</b>                    | 404/3,128 (12.9)     | 1.02 (0.90 to 1.14) | 0.75    |
| <b>TgAb negative</b>                       | 1,867/17,292 (10.8)  | Ref                 | Ref     |
| <b>TgAb positivity</b>                     | 117/1,063 (11)       | 0.97 (0.78 to 1.19) | 0.78    |

Table shows the association of maternal thyroid function test abnormalities with macrosomia (birth weight>4000 grams). All analyses were adjusted for maternal age, BMI, ethnicity, smoking, parity, gestational age at blood sampling, fetal sex and gestational age at birth.

**Supplemental Table 10.** Association of thyroid function test abnormalities as well as TSH and FT4 concentrations with small for gestational age according to adjustment for gestational diabetes mellitus (GDM).

| Small for Gestational Age                  |        |               |                        |         |                     |         |
|--------------------------------------------|--------|---------------|------------------------|---------|---------------------|---------|
|                                            |        |               | Not adjusted with GDM* |         | + GDM*              |         |
|                                            | N      | GDM cases (%) | OR (95% CI)            | P value | OR (95% CI)         | P value |
| <i>Thyroid function test abnormalities</i> |        |               |                        |         |                     |         |
| <b>Euthyroid</b>                           | 35,181 | 868 (2.3)     | Ref                    | Ref     | Ref                 | Ref     |
| <b>Subclinical Hypothyroidism</b>          | 1,206  | 21 (1.7)      | 1.21 (1.01 to 1.45)    | 0.029   | 1.21 (1.01 to 1.45) | 0.031   |
| <b>Subclinical Hyperthyroidism</b>         | 566    | 14 (2.3)      | 0.88 (0.65 to 1.18)    | 0.41    | 0.88 (0.65 to 1.18) | 0.40    |
| <b>Overt hyperthyroidism</b>               | 314    | 9 (2.7)       | 1.05 (0.73 to 1.51)    | 0.77    | 1.05 (0.73 to 1.52) | 0.76    |
| <b>Isolated hypothyroxinemia</b>           | 856    | 37 (4.0)      | 0.73 (0.56 to 0.95)    | 0.018   | 0.73 (0.57 to 0.95) | 0.021   |
| <i>Continuous</i>                          |        |               |                        |         |                     |         |
| <b>TSH</b>                                 | 43,571 | 1,057 (2.2)   | 1.03 (1.00 to 1.07)    | 0.027   | 1.03 (1.00 to 1.07) | 0.029   |
| <b>FT4</b>                                 | 43,726 | 1,053 (2.2)   | 1.09 (1.05 to 1.12)    | <0.0001 | 1.09 (1.05 to 1.12) | <0.0001 |

Table shows the association of maternal thyroid function test abnormalities as well as continuous TSH and FT4 Z-scores with small for gestational age (SGA) in a subset with available data on gestational diabetes mellitus (GDM). All analyses were adjusted for maternal age, BMI, ethnicity, smoking, parity, gestational age at blood sampling and fetal sex.

\* Missing in cohorts: Mosso et al., EFSOCH and Ghafoor et al.

**Supplemental Table 11.** Association of thyroid function test abnormalities as well as TSH and FT4 concentrations with large for gestational age according to adjustment for gestational diabetes mellitus (GDM).

| Large for Gestational Age                  |        |                        |                     |         |                     |         |
|--------------------------------------------|--------|------------------------|---------------------|---------|---------------------|---------|
|                                            |        | Not adjusted with GDM* |                     |         | + GDM*              |         |
|                                            | N      | GDM cases (%)          | OR (95% CI)         | P value | OR (95% CI)         | P value |
| <i>Thyroid function test abnormalities</i> |        |                        |                     |         |                     |         |
| <b>Euthyroid</b>                           | 35,181 | 868 (2.3)              | Ref                 | Ref     | Ref                 | Ref     |
| <b>Subclinical Hypothyroidism</b>          | 1,206  | 21 (1.7)               | 1.04 (0.85 to 1.26) | 0.68    | 1.04 (0.85 to 1.27) | 0.65    |
| <b>Subclinical Hyperthyroidism</b>         | 566    | 14 (2.3)               | 0.79 (0.58 to 1.08) | 0.14    | 0.79 (0.58 to 1.08) | 0.15    |
| <b>Overt hyperthyroidism</b>               | 314    | 9 (2.7)                | 0.92 (0.63 to 1.37) | 0.71    | 0.93 (0.63 to 1.37) | 0.72    |
| <b>Isolated hypothyroxinemia</b>           | 856    | 37 (4.0)               | 1.14 (0.92 to 1.42) | 0.20    | 1.13 (0.91 to 1.40) | 0.24    |
| <i>Continuous</i>                          |        |                        |                     |         |                     |         |
| <b>TSH</b>                                 | 43,571 | 1,057 (2.2)            | 0.99 (0.96 to 1.02) | 0.72    | 0.99 (0.96 to 1.02) | 0.76    |
| <b>FT4</b>                                 | 43,726 | 1,053 (2.2)            | 0.88 (0.85 to 0.91) | <0.0001 | 0.88 (0.85 to 0.91) | <0.0001 |

Table shows the association of maternal thyroid function test abnormalities as well as continuous TSH and FT4 Z-scores with large for gestational age in a subset with available data on gestational diabetes mellitus (GDM). All analyses were adjusted for maternal age, BMI, ethnicity, smoking, parity, gestational age at blood sampling and fetal sex.

\* Missing in cohorts: Mosso et al., EFSOCH and Ghafoor et al.

**Supplemental Table 12.** Association of thyroid function test abnormalities as well as TSH and FT4 concentrations with birth weight according to adjustment for gestational diabetes mellitus (GDM).

|                                            |        | Birth weight (grams)   |                    |         |                    |         |
|--------------------------------------------|--------|------------------------|--------------------|---------|--------------------|---------|
|                                            |        | Not adjusted with GDM* |                    |         | + GDM*             |         |
|                                            | N      | GDM cases (%)          | Beta (95% CI)      | P value | Beta (95% CI)      | P value |
| <i>Thyroid function test abnormalities</i> |        |                        |                    |         |                    |         |
| <b>Euthyroid</b>                           | 35,181 | 868 (2.3)              | Ref                | Ref     | Ref                | Ref     |
| <b>Subclinical Hypothyroidism</b>          | 1,206  | 21 (1.7)               | -35.7 (-60 to -11) | 0.004   | -35.0 (-59 to -10) | 0.005   |
| <b>Subclinical Hyperthyroidism</b>         | 566    | 14 (2.3)               | 14.5 (-21 to 51)   | 0.43    | 14.8 (-21 to 51)   | 0.42    |
| <b>Overt hyperthyroidism</b>               | 314    | 9 (2.7)                | -22.9 (-70 to 24)  | 0.34    | -23.1 (-70 to 24)  | 0.33    |
| <b>Isolated hypothyroxinemia</b>           | 856    | 37 (4.0)               | 33.9 (4.7 to 63)   | 0.022   | 32.0 (2.9 to 61)   | 0.031   |
| <i>Continuous</i>                          |        |                        |                    |         |                    |         |
| <b>TSH</b>                                 | 43,571 | 1,057 (2.2)            | -6.6 (-10 to -3.5) | 0.001   | -6.5 (-10 to -2.3) | 0.002   |
| <b>FT4</b>                                 | 43,726 | 1,053 (2.2)            | -20.8 (-25 to -17) | <0.0001 | -20.5 (-25 to -16) | <0.001  |

Table shows the association of maternal thyroid function test abnormalities as well as continuous TSH and FT4 Z-scores with birth weight (grams) in a subset with available data on gestational diabetes mellitus (GDM). All analyses were adjusted for maternal age, BMI, ethnicity, smoking, parity, gestational age at blood sampling, fetal sex and gestational age at birth.

\* Missing in cohorts: Mosso et al., EFSOCH and Ghafoor et al.

**Supplemental Table 13.** Association of thyroid function test abnormalities as well as TSH and FT4 concentrations with small for gestational age according to adjustment for preeclampsia.

| Small for Gestational Age                  |        |                                 |                     |         |                     |         |
|--------------------------------------------|--------|---------------------------------|---------------------|---------|---------------------|---------|
|                                            |        | Not adjusted with Preeclampsia* |                     |         | + Preeclampsia*     |         |
|                                            | N      | GDM cases (%)                   | OR (95% CI)         | P value | OR (95% CI)         | P value |
| <i>Thyroid function test abnormalities</i> |        |                                 |                     |         |                     |         |
| <b>Euthyroid</b>                           | 26585  | 588 (1.6)                       | Ref                 | Ref     | Ref                 | Ref     |
| <b>Subclinical Hypothyroidism</b>          | 866    | 30 (2.5)                        | 1.31 (1.06 to 1.62) | 0.009   | 1.30 (1.05 to 1.60) | 0.013   |
| <b>Subclinical Hyperthyroidism</b>         | 427    | 9 (1.5)                         | 0.96 (0.68 to 1.35) | 0.81    | 0.95 (0.67 to 1.34) | 0.79    |
| <b>Overt hyperthyroidism</b>               | 233    | 6 (1.8)                         | 0.81 (0.50 to 1.33) | 0.42    | 0.81 (0.49 to 1.32) | 0.41    |
| <b>Isolated hypothyroxinemia</b>           | 644    | 16 (1.8)                        | 0.69 (0.51 to 0.94) | 0.022   | 0.69 (0.51 to 0.94) | 0.021   |
| <i>Continuous</i>                          |        |                                 |                     |         |                     |         |
| <b>TSH</b>                                 | 32,147 | 714 (1.6)                       | 1.07 (1.03 to 1.11) | 0.0004  | 1.07 (1.03 to 1.11) | 0.0005  |
| <b>FT4</b>                                 | 32,211 | 714 (1.6)                       | 1.05 (1.01 to 1.10) | 0.003   | 1.05 (1.01 to 1.10) | 0.003   |

Table shows the association of maternal thyroid function test abnormalities as well as continuous TSH and FT4 Z-scores with small for gestational age (SGA) in a subset with available data on preeclampsia. All analyses were adjusted for maternal age, BMI, ethnicity, smoking, parity, gestational age at blood sampling and fetal sex.

\* Missing in cohorts: Mosso et al., HAPPY, EFSOCH, Ghafoor et al., INMA, ALSPAC and Wijnen & Pop.

**Supplemental Table 14.** Association of thyroid function test abnormalities as well as TSH and FT4 concentrations with large for gestational age according to adjustment for preeclampsia.

| <b>Large for Gestational Age</b>           |        |                        |                                 |         |                     |         |
|--------------------------------------------|--------|------------------------|---------------------------------|---------|---------------------|---------|
|                                            |        |                        | Not adjusted with Preeclampsia* |         | + Preeclampsia*     |         |
|                                            | N      | Preeclampsia cases (%) | OR (95% CI)                     | P value | OR (95% CI)         | P value |
| <i>Thyroid function test abnormalities</i> |        |                        |                                 |         |                     |         |
| <b>Euthyroid</b>                           | 26585  | 588 (1.6)              | Ref                             | Ref     | Ref                 | Ref     |
| <b>Subclinical Hypothyroidism</b>          | 866    | 30 (2.5)               | 0.93 (0.74 to 1.18)             | 0.57    | 0.94 (0.74 to 1.18) | 0.60    |
| <b>Subclinical Hyperthyroidism</b>         | 427    | 9 (1.5)                | 0.94 (0.68 to 1.31)             | 0.75    | 0.95 (0.68 to 1.31) | 0.75    |
| <b>Overt hyperthyroidism</b>               | 233    | 6 (1.8)                | 0.76 (0.47 to 1.23)             | 0.26    | 0.76 (0.47 to 1.23) | 0.27    |
| <b>Isolated hypothyroxinemia</b>           | 644    | 16 (1.8)               | 1.13 (0.88 to 1.45)             | 0.31    | 1.13 (0.89 to 1.45) | 0.30    |
| <i>Continuous</i>                          |        |                        |                                 |         |                     |         |
| <b>TSH</b>                                 | 32,147 | 714 (1.6)              | 0.98 (0.95 to 1.02)             | 0.58    | 0.98 (0.95 to 1.02) | 0.58    |
| <b>FT4</b>                                 | 32,211 | 714 (1.6)              | 0.92 (0.89 to 0.96)             | 0.0001  | 0.92 (0.89 to 0.96) | 0.0001  |

Table shows the association of maternal thyroid function test abnormalities as well as continuous TSH and FT4 Z-scores with large for gestational age in a subset with available data on preeclampsia. All analyses were adjusted for maternal age, BMI, ethnicity, smoking, parity, gestational age at blood sampling and fetal sex.

\* Missing in cohorts: Mosso et al., HAPPY, EFSOCH, Ghafoor et al., INMA, ALSPAC and Wijnen & Pop.

**Supplemental Table 15.** Association of thyroid function test abnormalities as well as TSH and FT4 concentrations with birth weight according to adjustment for preeclampsia.

|                                            |        | <b>Birth weight (grams)</b>     |                    |         |                    |         |
|--------------------------------------------|--------|---------------------------------|--------------------|---------|--------------------|---------|
|                                            |        | Not adjusted with Preeclampsia* |                    |         | + Preeclampsia*    |         |
|                                            | N      | Preeclampsia cases (%)          | Beta (95% CI)      | P value | Beta (95% CI)      | P value |
| <i>Thyroid function test abnormalities</i> |        |                                 |                    |         |                    |         |
| <b>Euthyroid</b>                           | 26585  | 588 (1.6)                       | Ref                | Ref     | Ref                | Ref     |
| <b>Subclinical Hypothyroidism</b>          | 866    | 30 (2.5)                        | -44.7 (-73 to -16) | 0.002   | -43.1 (-71 to -14) | 0.002   |
| <b>Subclinical Hyperthyroidism</b>         | 427    | 9 (1.5)                         | 5.45 (-34 to 45)   | 0.79    | 5.79 (-34 to 45)   | 0.77    |
| <b>Overt hyperthyroidism</b>               | 233    | 6 (1.8)                         | -24.9 (-79 to 29)  | 0.36    | -24.1 (-78 to 29)  | 0.38    |
| <b>Isolated hypothyroxinemia</b>           | 644    | 16 (1.8)                        | 45.4 (12 to 78)    | 0.007   | 45.1 (12 to 78)    | 0.007   |
| <i>Continuous</i>                          |        |                                 |                    |         |                    |         |
| <b>TSH</b>                                 | 32,147 | 714 (1.6)                       | -6.7 (-11 to -1.9) | 0.006   | -6.7 (-11 to -1.9) | 0.006   |
| <b>FT4</b>                                 | 32,211 | 714 (1.6)                       | -20.9 (-25 to -16) | 0.0009  | -20.7 (-25 to -15) | 0.0008  |

Table shows the association of maternal thyroid function test abnormalities as well as continuous TSH and FT4 Z-scores with birth weight (grams) in a subset with available data on preeclampsia. All analyses were adjusted for maternal age, BMI, ethnicity, smoking, parity, gestational age at blood sampling, fetal sex and gestational age at birth.

\* Missing in cohorts: Mosso et al., HAPPY, EFSOCH, Ghafoor et al., INMA, ALSPAC and Wijnen & Pop.



**Supplemental Table 16.** Crude association of thyroid function test abnormalities with birth weight.

|                                            | Small for Gestational Age |                     |         | Large for Gestational Age* |                     |         | Birth weight (grams)* |         |
|--------------------------------------------|---------------------------|---------------------|---------|----------------------------|---------------------|---------|-----------------------|---------|
|                                            | N of events/<br>Total (%) | OR (95% CI)         | P value | N of events (%)            | OR (95% CI)         | P value | Beta (95% CI)         | P value |
| <i>Thyroid function test abnormalities</i> |                           |                     |         |                            |                     |         |                       |         |
| <b>Euthyroid</b>                           | 3,824/38,248 (10.0)       | Reference           | -       | 3,761 (9.8)                | Reference           | -       | Reference             | -       |
| <b>Subclinical Hypothyroidism</b>          | 151/1,275 (11.8)          | 1.22 (1.03 to 1.46) | 0.020   | 121 (9.5)                  | 0.93 (0.77 to 1.13) | 0.52    | -36 (-60 to -12)      | 0.003   |
| <b>Subclinical Hyperthyroidism</b>         | 51/617 (8.3)              | 0.82 (0.61 to 1.10) | 0.19    | 65 (10.5)                  | 1.05 (0.81 to 1.36) | 0.68    | 35 (2 to 70)          | 0.02    |
| <b>Overt hyperthyroidism</b>               | 27/336 (8.0)              | 0.79 (0.53 to 1.18) | 0.25    | 27 (8.0)                   | 0.78 (0.53 to 1.16) | 0.23    | -17 (-63 to 29)       | 0.40    |
| <b>Isolated hypothyroxinemia</b>           | 68/929 (7.3)              | 0.73 (0.57 to 0.94) | 0.015   | 117 (12.6)                 | 1.25 (1.02 to 1.52) | 0.025   | 46 (18 to 74)         | 0.001   |

Table shows the crude association of maternal Thyroid function test abnormalities with small for gestational age (SGA), large for gestational age (LGA) and continuous birth weight (grams). All analyses of SGA and LGA were only adjusted for maternal age. For birth weight, the adjustments were maternal age, fetal sex and gestational age at birth.

\* Total N is the same as stated in the 2<sup>nd</sup> column.

**Supplemental Table 17.** Crude association of TSH and FT4 concentrations with birth weight.

|                                | Small for Gestational Age |                     |         | Large for Gestational Age |         | Birth weight (grams) |         |
|--------------------------------|---------------------------|---------------------|---------|---------------------------|---------|----------------------|---------|
|                                | N                         | OR (95% CI)         | P value | OR (95% CI)               | P value | Beta (95% CI)        | P value |
| <i>Z-scores</i>                |                           |                     |         |                           |         |                      |         |
| <b>TSH</b>                     | 47,071                    | 1.06 (1.03 to 1.10) | <0.0001 | 0.97 (0.94 to 1.00)       | 0.071   | -10 (-13 to -6)      | <0.0001 |
| <b>FT4</b>                     | 47,225                    | 1.06 (1.02 to 1.09) | 0.0002  | 0.91 (0.88 to 0.94)       | <0.0001 | -20 (-24 to -16)     | <0.0001 |
| <i>Within the normal range</i> |                           |                     |         |                           |         |                      |         |
| <b>TSH</b>                     | 45,158                    | 1.07 (1.03 to 1.11) | <0.0001 | 0.97 (0.94 to 1.01)       | 0.16    | -9 (-14 to -4)       | 0.0001  |
| <b>FT4</b>                     | 45,062                    | 1.05 (1.01 to 1.09) | 0.005   | 0.91 (0.87 to 0.95)       | <0.0001 | -20 (-25 to -15)     | <0.0001 |

Table shows the crude association of maternal TSH and FT4 (Z-scores) in full or within the normal range (2.5<sup>th</sup>-97.5<sup>th</sup> percentiles) with small for gestational age (SGA), large for gestational age (LGA) and continuous birth weight (grams). All analyses of SGA and LGA were only adjusted for maternal age. For birth weight, the adjustments were maternal age, fetal sex and gestational age at birth.

## Supplemental Table 18. Cohort-specific quality assessment by The Newcastle-Ottawa Scale

### NEWCASTLE - OTTAWA QUALITY ASSESSMENT SCALE COHORT STUDIES

|                                                                                                                  | Generation R | GIRONA 1 | GIRONA 2 | Chen et al. | Western Australia | RHEA     | Mosso et al. | VIVA     | Wijnen & Pop |
|------------------------------------------------------------------------------------------------------------------|--------------|----------|----------|-------------|-------------------|----------|--------------|----------|--------------|
| <b>Selection</b>                                                                                                 |              |          |          |             |                   |          |              |          |              |
| 1) <u>Representativeness of the exposed cohort</u>                                                               |              |          |          |             |                   |          |              |          |              |
| a) truly representative of the average pregnant woman in the community *                                         | *            | *        | *        | *           | *                 | *        | *            | *        | *            |
| b) somewhat representative of the average pregnant woman in the community *                                      |              |          |          |             |                   |          |              |          |              |
| c) selected group of users eg nurses, volunteers                                                                 |              |          |          |             |                   |          |              |          |              |
| d) no description of the derivation of the cohort                                                                |              |          |          |             |                   |          |              |          |              |
| 2) <u>Selection of the non exposed cohort</u>                                                                    |              |          |          |             |                   |          |              |          |              |
| a) drawn from the same community as the exposed cohort *                                                         | *            | *        | *        | *           | *                 | *        | *            | *        | *            |
| b) drawn from a different source                                                                                 |              |          |          |             |                   |          |              |          |              |
| c) no description of the derivation of the non exposed cohort                                                    |              |          |          |             |                   |          |              |          |              |
| 3) <u>Ascertainment of exposure</u>                                                                              |              |          |          |             |                   |          |              |          |              |
| a) secure record (laboratory measurement) *                                                                      | *            | *        | *        | *           | *                 | *        | *            | *        | *            |
| b) structured interview *                                                                                        |              |          |          |             |                   |          |              |          |              |
| c) written self report                                                                                           |              |          |          |             |                   |          |              |          |              |
| d) no description                                                                                                |              |          |          |             |                   |          |              |          |              |
| 4) <u>Demonstration that outcome of interest was not present at start of study</u>                               |              |          |          |             |                   |          |              |          |              |
| a) yes *                                                                                                         | *            | *        | *        | *           | *                 | *        | *            | *        | *            |
| b) no                                                                                                            |              |          |          |             |                   |          |              |          |              |
| <b>Comparability</b>                                                                                             |              |          |          |             |                   |          |              |          |              |
| 1) <u>Comparability of cohorts on the basis of the design or analysis</u>                                        |              |          |          |             |                   |          |              |          |              |
| a) study controls for maternal age *                                                                             | *            | *        | *        | *           | *                 | *        | *            | *        | *            |
| b) study controls for maternal smoking *                                                                         | *            | *        | *        | *           | *                 | *        | *            | *        | *            |
| <b>Outcome</b>                                                                                                   |              |          |          |             |                   |          |              |          |              |
| 1) <u>Assessment of outcome</u>                                                                                  |              |          |          |             |                   |          |              |          |              |
| a) either independent blind assessment * or (combined with) b) record linkage *                                  | *            | *        | *        | *           | *                 | *        | *            | *        | *            |
| c) self report                                                                                                   |              |          |          |             |                   |          |              |          |              |
| d) no description                                                                                                |              |          |          |             |                   |          |              |          |              |
| 2) <u>Was follow-up long enough for outcomes to occur</u>                                                        |              |          |          |             |                   |          |              |          |              |
| a) yes (select an adequate follow up period for outcome of interest) *                                           | *            | *        | *        | *           | *                 | *        | *            | *        | *            |
| b) no                                                                                                            |              |          |          |             |                   |          |              |          |              |
| 3) <u>Adequacy of follow up of cohorts</u>                                                                       |              |          |          |             |                   |          |              |          |              |
| a) complete follow up - all subjects accounted for *                                                             |              |          | *        |             | *                 |          |              | *        | *            |
| b) subjects lost to follow up unlikely to introduce bias - small number lost - < 5% or no differential missing * | *            | *        |          | *           |                   | *        | *            |          |              |
| c) follow up rate < 85% with no difference in thyroid function                                                   |              |          |          |             |                   |          |              |          |              |
| d) no statement                                                                                                  |              |          |          |             |                   |          |              |          |              |
| <b>Total Score (Stars out of a max. 9)</b>                                                                       | <b>9</b>     | <b>9</b> | <b>9</b> | <b>9</b>    | <b>9</b>          | <b>9</b> | <b>9</b>     | <b>9</b> | <b>9</b>     |

**NEWCASTLE - OTTAWA QUALITY ASSESSMENT SCALE COHORT STUDIES**

|                                                                                                                      | ABCD     | Popova et al. | Hisada et al. | Happy    | EFSOCH   | Ghafoor et al | INMA     | Bliddal et al | NFBC     | PIP Study | ALSPAC   |
|----------------------------------------------------------------------------------------------------------------------|----------|---------------|---------------|----------|----------|---------------|----------|---------------|----------|-----------|----------|
| <b>Selection</b>                                                                                                     |          |               |               |          |          |               |          |               |          |           |          |
| 1) <u>Representativeness of the exposed cohort</u>                                                                   |          |               |               |          |          |               |          |               |          |           |          |
| a) truly representative of the average pregnant woman in the community *                                             | *        | *             | *             | *        | *        |               | *        |               | *        | *         | *        |
| b) somewhat representative of the average pregnant woman in the community *                                          |          |               |               |          |          | *             |          | *             |          |           |          |
| c) selected group of users eg nurses, volunteers                                                                     |          |               |               |          |          |               |          |               |          |           |          |
| d) no description of the derivation of the cohort                                                                    |          |               |               |          |          |               |          |               |          |           |          |
| 2) <u>Selection of the non exposed cohort</u>                                                                        |          |               |               |          |          |               |          |               |          |           |          |
| a) drawn from the same community as the exposed cohort *                                                             | *        | *             | *             | *        | *        | *             | *        | *             | *        | *         | *        |
| b) drawn from a different source                                                                                     |          |               |               |          |          |               |          |               |          |           |          |
| c) no description of the derivation of the non exposed cohort                                                        |          |               |               |          |          |               |          |               |          |           |          |
| 3) <u>Ascertainment of exposure</u>                                                                                  |          |               |               |          |          |               |          |               |          |           |          |
| a) secure record (laboratory measurement) *                                                                          | *        | *             | *             | *        | *        | *             | *        | *             | *        | *         | *        |
| b) structured interview *                                                                                            |          |               |               |          |          |               |          |               |          |           |          |
| c) written self report                                                                                               |          |               |               |          |          |               |          |               |          |           |          |
| d) no description                                                                                                    |          |               |               |          |          |               |          |               |          |           |          |
| 4) <u>Demonstration that outcome of interest was not present at start of study</u>                                   |          |               |               |          |          |               |          |               |          |           |          |
| a) yes *                                                                                                             | *        | *             | *             | *        | *        | *             | *        | *             | *        | *         | *        |
| b) no                                                                                                                |          |               |               |          |          |               |          |               |          |           |          |
| <b>Comparability</b>                                                                                                 |          |               |               |          |          |               |          |               |          |           |          |
| 1) <u>Comparability of cohorts on the basis of the design or analysis</u>                                            |          |               |               |          |          |               |          |               |          |           |          |
| a) study controls for maternal age *                                                                                 | *        | *             | *             | *        | *        | *             | *        | *             | *        | *         | *        |
| b) study controls for maternal smoking *                                                                             | *        | *             | *             | *        | *        | X             | *        | *             | *        | *         | *        |
| <b>Outcome</b>                                                                                                       |          |               |               |          |          |               |          |               |          |           |          |
| 1) <u>Assessment of outcome</u>                                                                                      |          |               |               |          |          |               |          |               |          |           |          |
| a) either independent blind assessment * or (combined with) b) record linkage *                                      | *        | *             | *             | *        | *        | *             | *        | *             | *        | *         | *        |
| c) self report                                                                                                       |          |               |               |          |          |               |          |               |          |           |          |
| d) no description                                                                                                    |          |               |               |          |          |               |          |               |          |           |          |
| 2) <u>Was follow-up long enough for outcomes to occur</u>                                                            |          |               |               |          |          |               |          |               |          |           |          |
| a) yes (select an adequate follow up period for outcome of interest) *                                               | *        | *             | *             | *        | *        | *             | *        | *             | *        | *         | *        |
| b) no                                                                                                                |          |               |               |          |          |               |          |               |          |           |          |
| 3) <u>Adequacy of follow up of cohorts</u>                                                                           |          |               |               |          |          |               |          |               |          |           |          |
| a) complete follow up - all subjects accounted for *                                                                 |          |               | *             |          | *        |               |          |               |          |           |          |
| b) subjects lost to follow up unlikely to introduce bias - small number lost - < 5% or no differential missingness * | *        | *             |               | *        |          | *             | *        |               | *        | *         | *        |
| c) follow up rate < 85% but no difference in thyroid function tests                                                  |          |               |               |          |          |               |          | X             |          |           |          |
| d) no statement                                                                                                      |          |               |               |          |          |               |          |               |          |           |          |
| <b>Total Score (Stars out of a max. 9)</b>                                                                           | <b>9</b> | <b>9</b>      | <b>9</b>      | <b>9</b> | <b>9</b> | <b>8</b>      | <b>9</b> | <b>8</b>      | <b>9</b> | <b>9</b>  | <b>9</b> |

Supplemental Figure 1. Association of TSH or FT4 with birth weight according to TPOAb status.

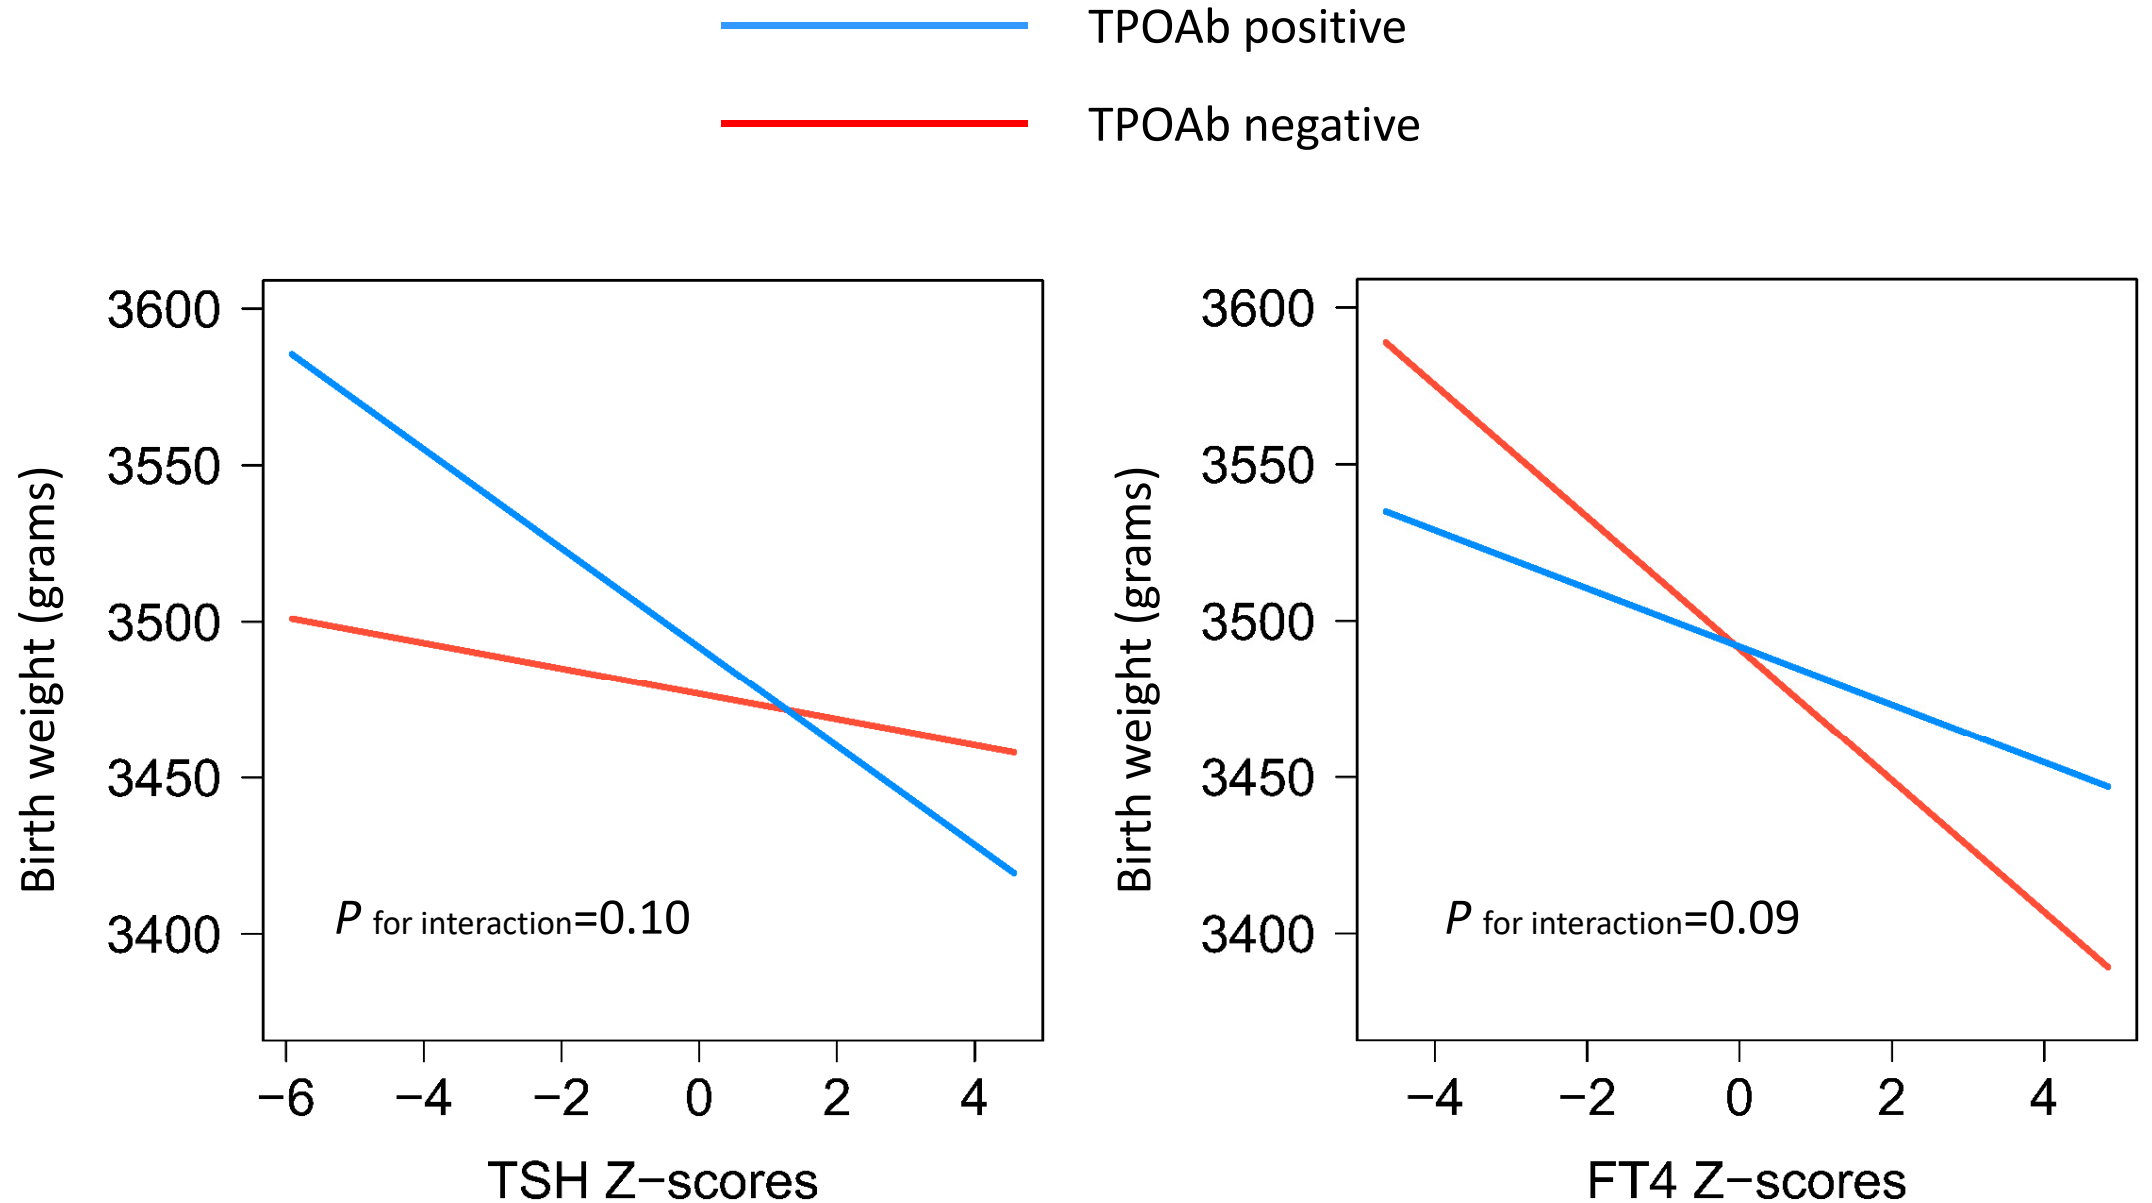

# Supplemental Figure 2. Two-step meta-analyses and funnel plots for the association of subclinical hypothyroidism with SGA, LGA or BW.

## SGA

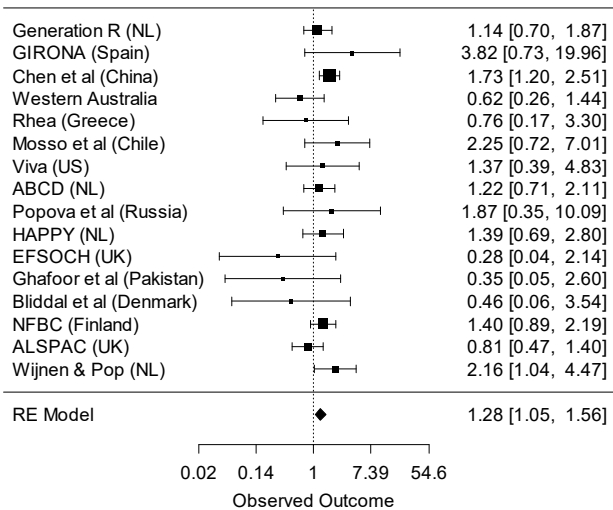

## LGA

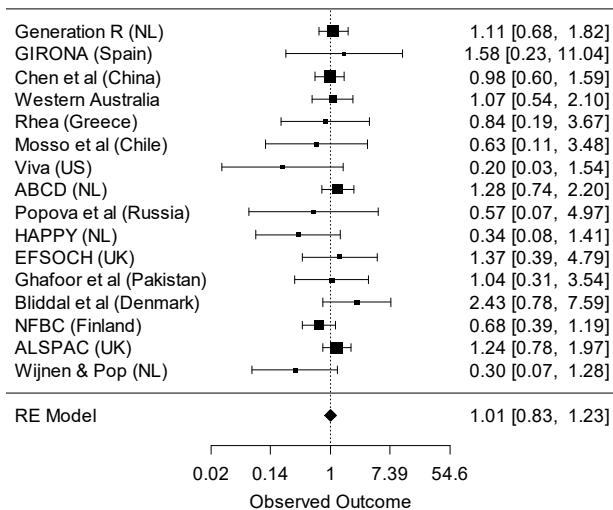

## BW

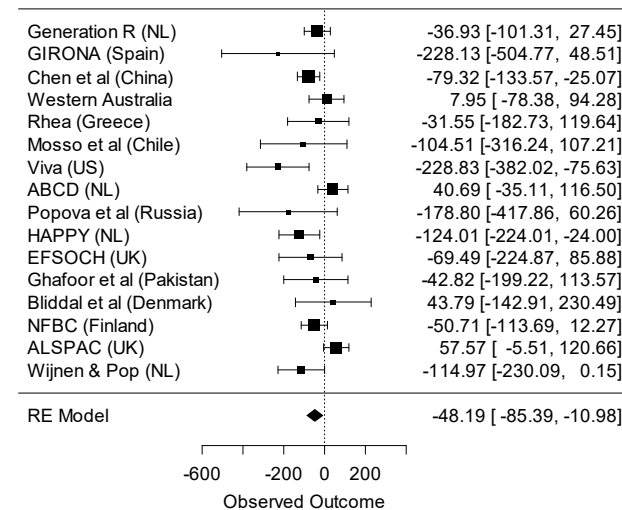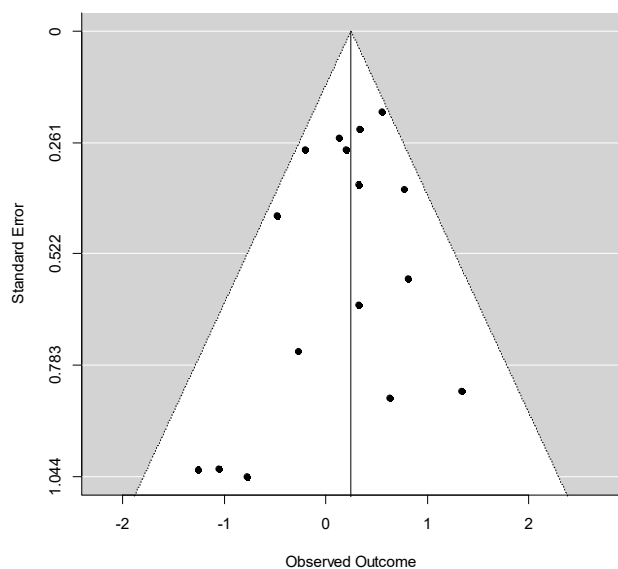

test for funnel plot asymmetry:  
 $z = -1.2460$ ,  $p = 0.2127$   
 $I^2(\%) = 9.56$  (0.0-79)  
 $H^2 = 1.10$  (1.0-4.9)

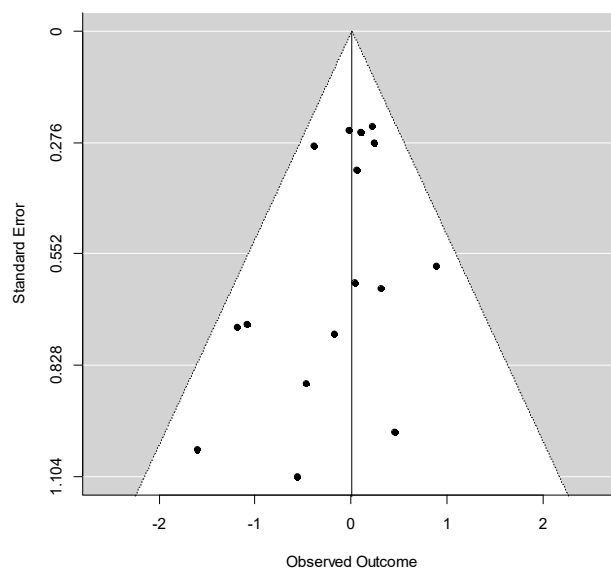

test for funnel plot asymmetry:  
 $z = -1.4309$ ,  $p = 0.1525$   
 $I^2(\%) = 0.0$  (0.0-73)  
 $H^2 = 1.0$  (1.0-3.7)

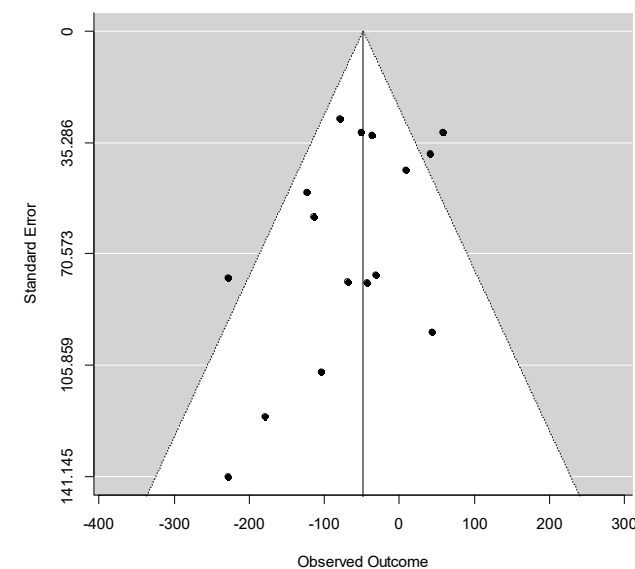

test for funnel plot asymmetry:  
 $z = -1.9175$ ,  $p = 0.0552$   
 $I^2(\%) = 49.7$  (9.8-83.5)  
 $H^2 = 1.98$  (1.10-6.04)

# Supplemental Figure 3. Two-step meta-analyses and funnel plots for the association of overt hyperthyroidism with SGA, LGA or BW.

## SGA

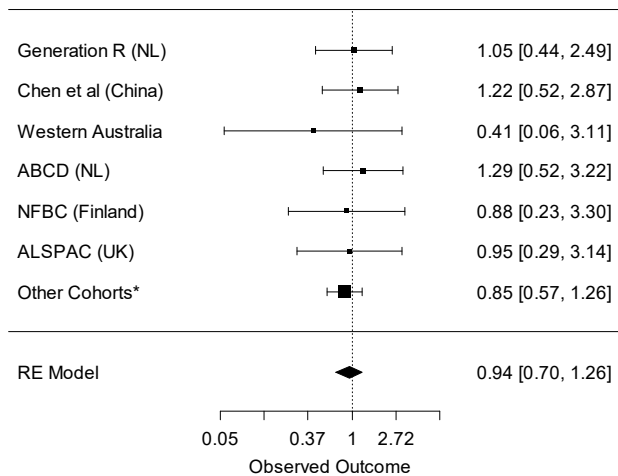

\*The following cohorts were pooled as one due to complete or quasi-complete separation: GIRONA, Rhea, Mosso et al, Viva, Popova et al, HAPPY, EFSOCH, Ghafoor et al, Bliddal et al and Wijnen & Pop.

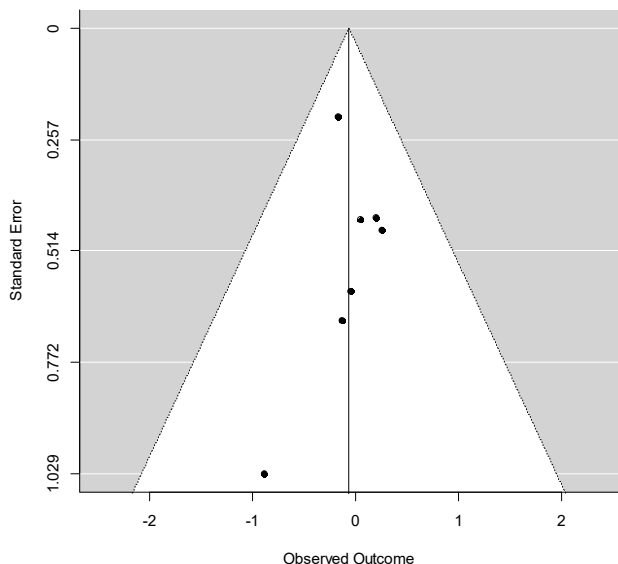

test for funnel plot asymmetry:  
 $z = 0.1163$ ,  $p = 0.9074$   
 $I^2(\%) = 0.0$  (0.0-32.5)  
 $H^2 = 1.0$  (1.0-1.48)

## LGA

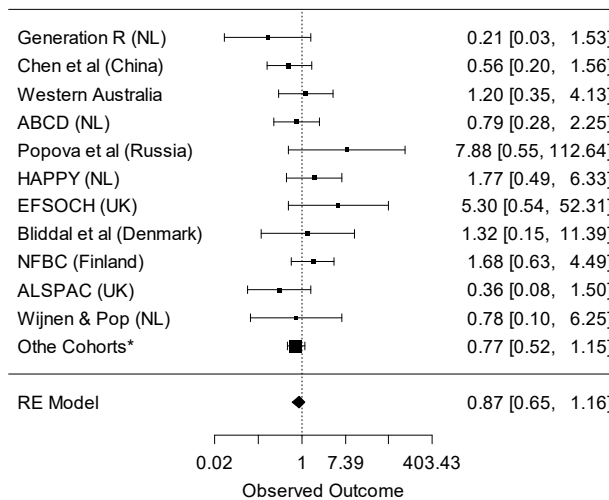

\*The following cohorts were pooled as one due to complete or quasi-complete separation: GIRONA, Rhea, Mosso et al, Viva and Ghafoor et al..

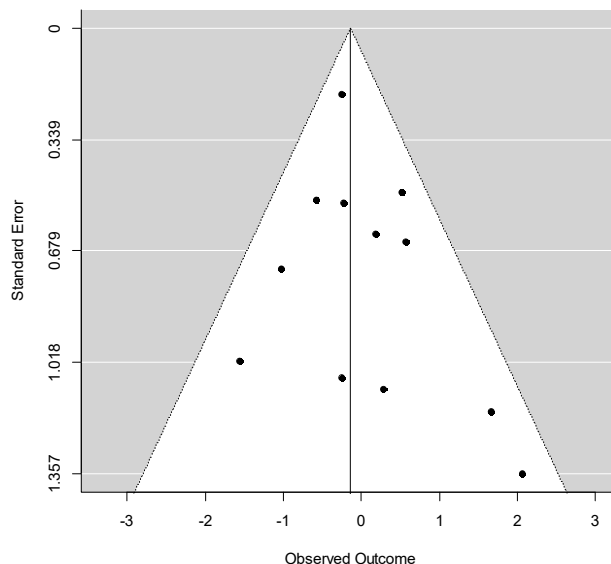

test for funnel plot asymmetry:  
 $z = 1.1189$ ,  $p = 0.2632$   
 $I^2(\%) = 0.0$  (0.0-84.5)  
 $H^2 = 1.0$  (1.0-6.4)

## BW

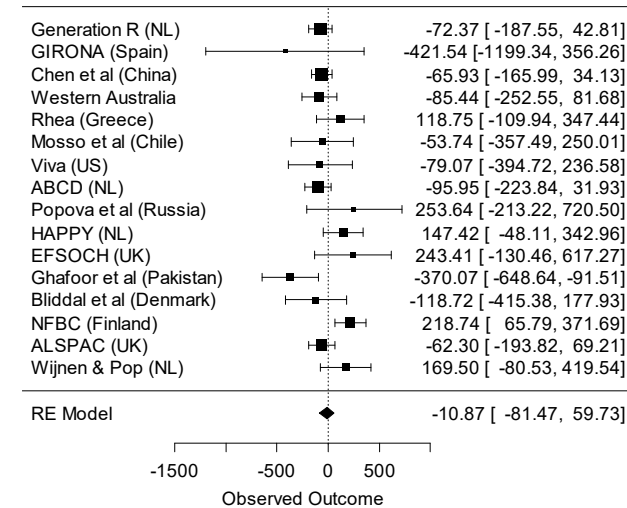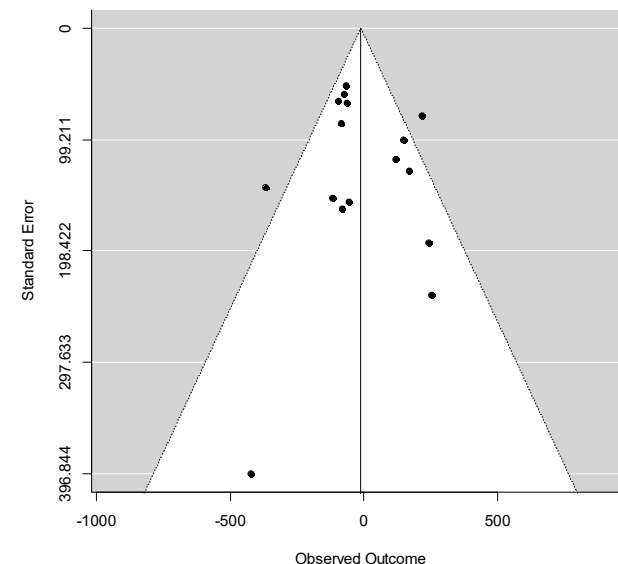

test for funnel plot asymmetry:  
 $z = 0.2092$ ,  $p = 0.8343$   
 $I^2(\%) = 48.7$  (10.7-86.4)  
 $H^2 = 1.94$  (1.11-7.3)

# Supplemental Figure 4. Two-step meta-analyses and funnel plots for the association of subclinical hyperthyroidism with SGA, LGA or BW.

## SGA

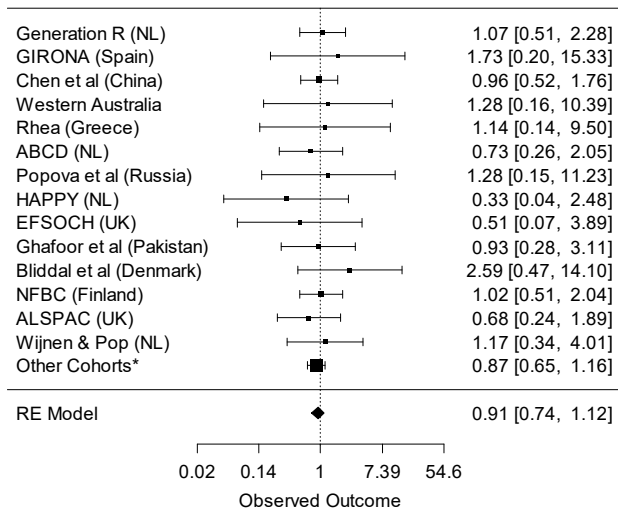

## LGA

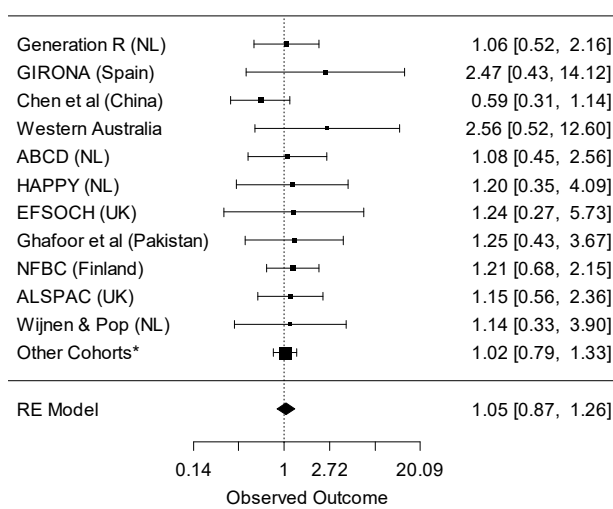

## BW

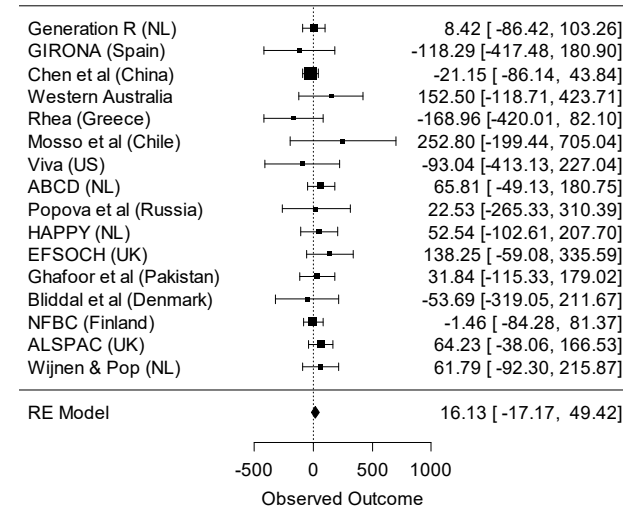

\*The following cohorts were pooled as one due to complete or quasi-complete separation: Mosso et al and Viva.

\*The following cohorts were pooled as one due to complete or quasi-complete separation: Rhea, Mosso et al, Viva, Popova et al and Bliddal et al.

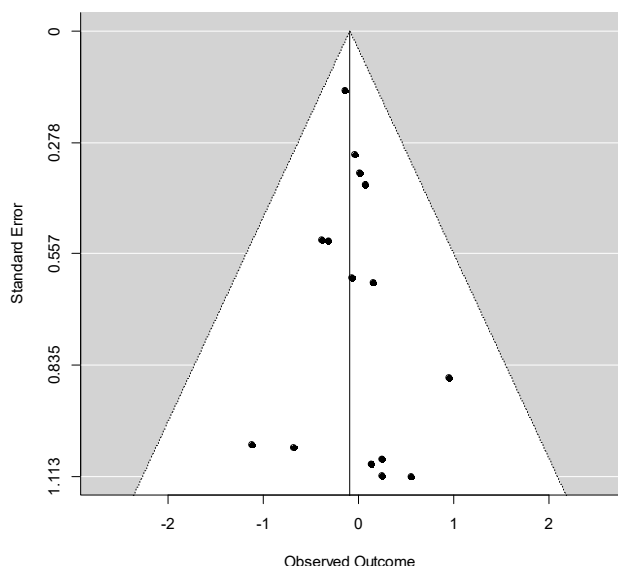

test for funnel plot asymmetry:  
 $z = 0.4161, p = 0.6773$   
 $I^2(\%) = 0.0 (0.0-0.0)$   
 $H^2 = 1.0 (1.0-1.0)$

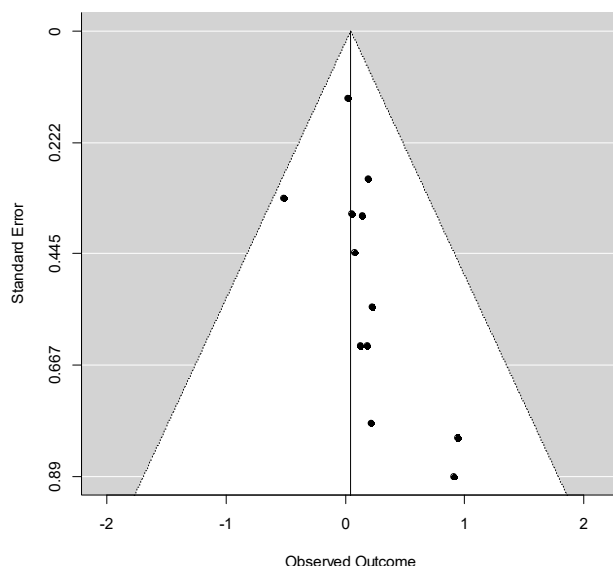

test for funnel plot asymmetry:  
 $z = 0.9981, p = 0.3182$   
 $I^2(\%) = 0.0 (0.0-37.8)$   
 $H^2 = 1.0 (1.00-1.60)$

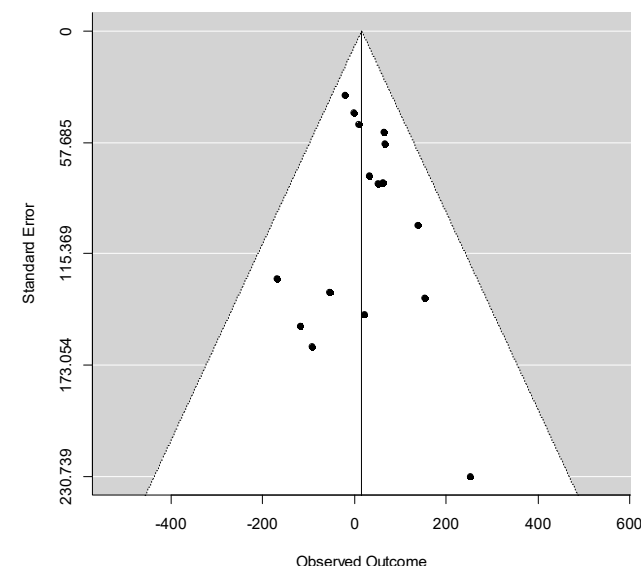

test for funnel plot asymmetry:  
 $z = 0.5519, p = 0.5810$   
 $I^2(\%) = 0.0 (0.0-1.95)$   
 $H^2 = 1.0 (1.0-1.02)$



# Supplemental Figure 5. Two-step meta-analyses and funnel plots for the association of hypothyroxinemia with SGA, LGA or BW.

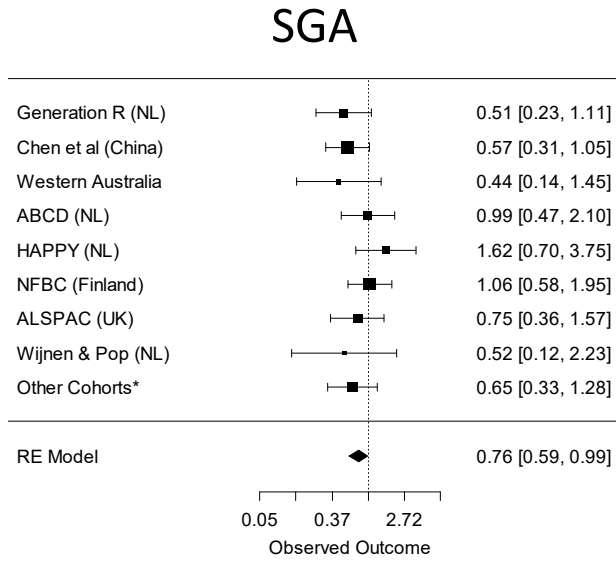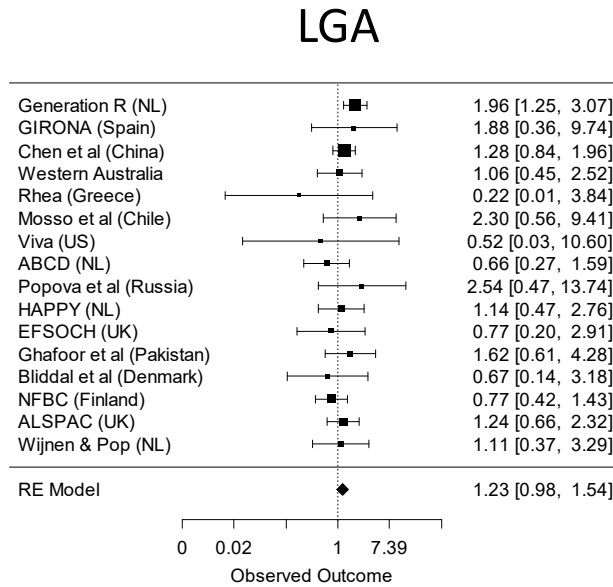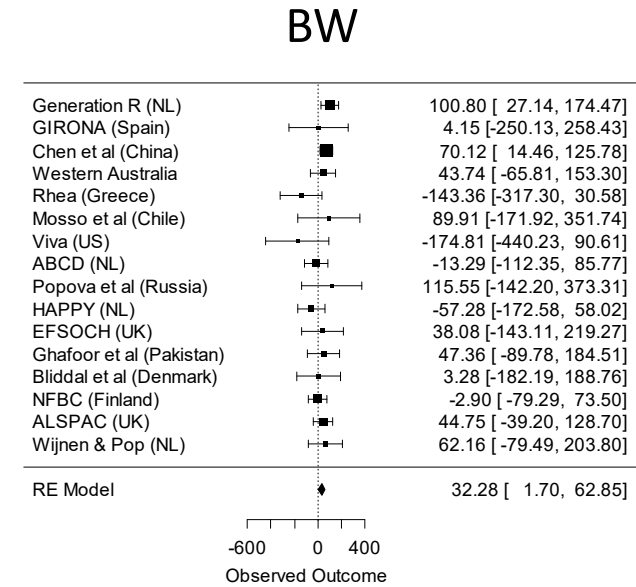

\*The following cohorts were pooled as one due to complete or quasi-complete separation: GIRONA, Rhea, Mosso et al, Viva, Popova et al, EFSOCH, Ghafoor et al and Bliddal et al.

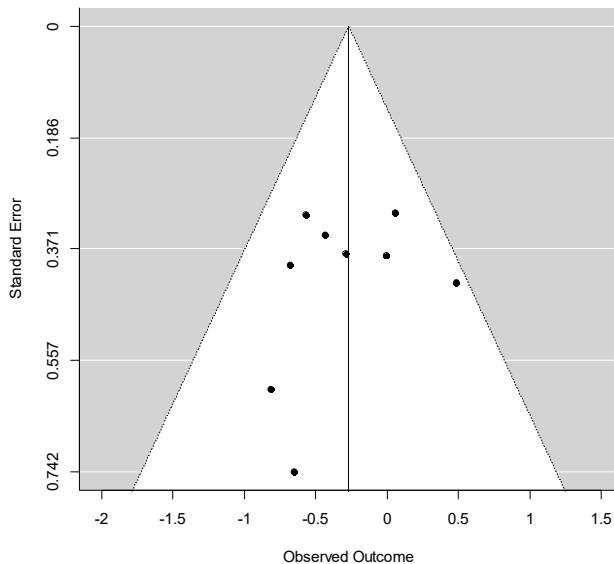

test for funnel plot asymmetry:  
 $z = -0.6054, p = 0.5449$   
 $I^2(\%) = 0.0 (0.0-74.5)$   
 $H^2 = 1.0 (1.0-3.91)$

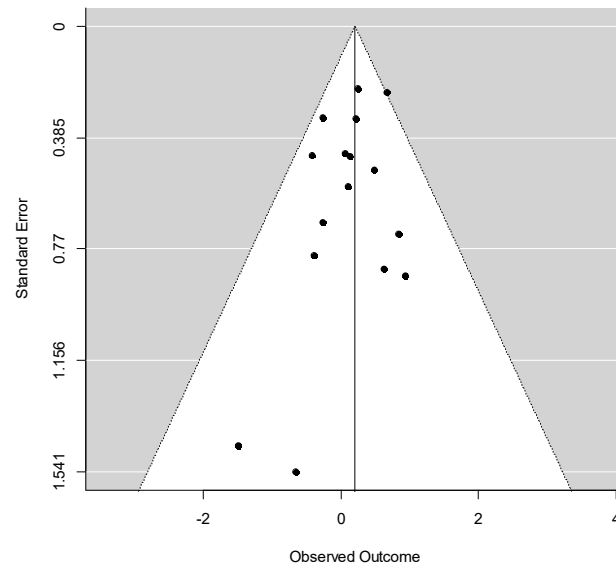

test for funnel plot asymmetry:  
 $z = -1.1264, p = 0.26$   
 $I^2(\%) = 8.28 (0.0-52.5)$   
 $H^2 = 1.09 (1.0-2.10)$

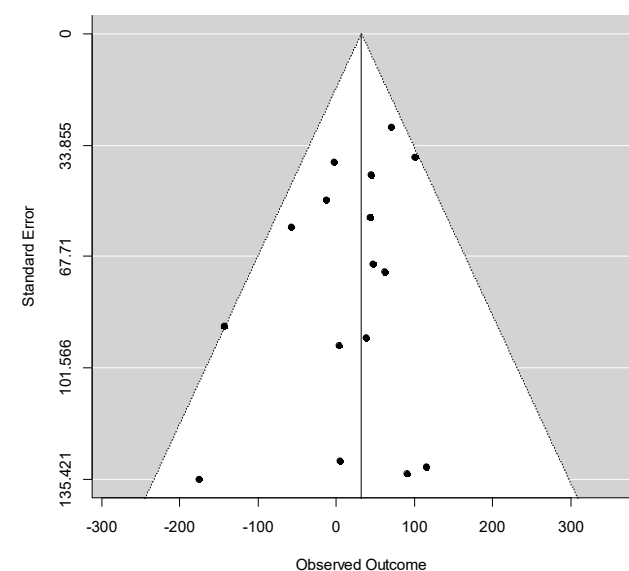

test for funnel plot asymmetry:  
 $z = -1.5989, p = 0.1098$   
 $I^2(\%) = 11.3 (0.0-56.2)$   
 $H^2 = 1.12 (1.0-2.28)$

# Supplemental Figure 6. Two-step meta-analyses and funnel plots for the association of TSH with SGA, LGA or BW.

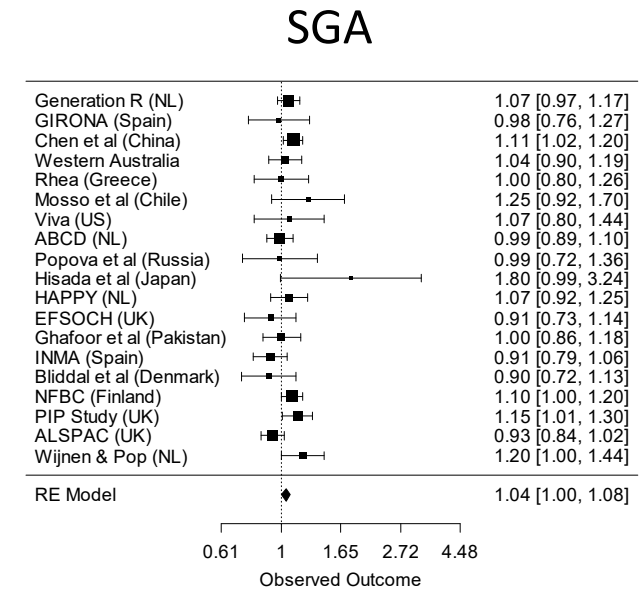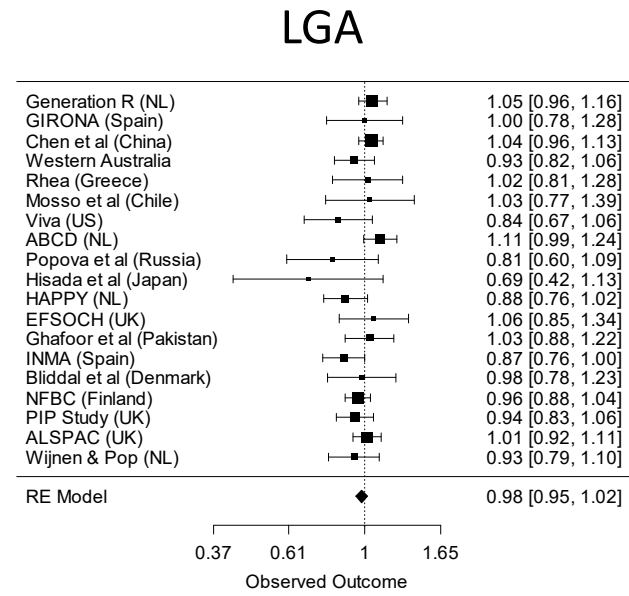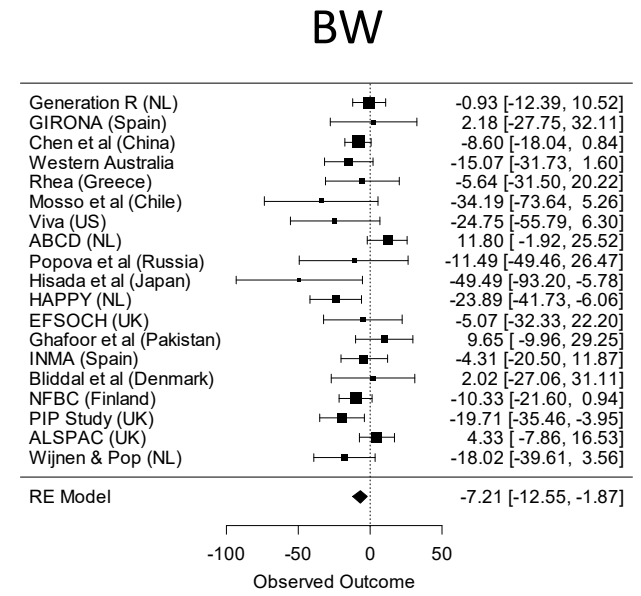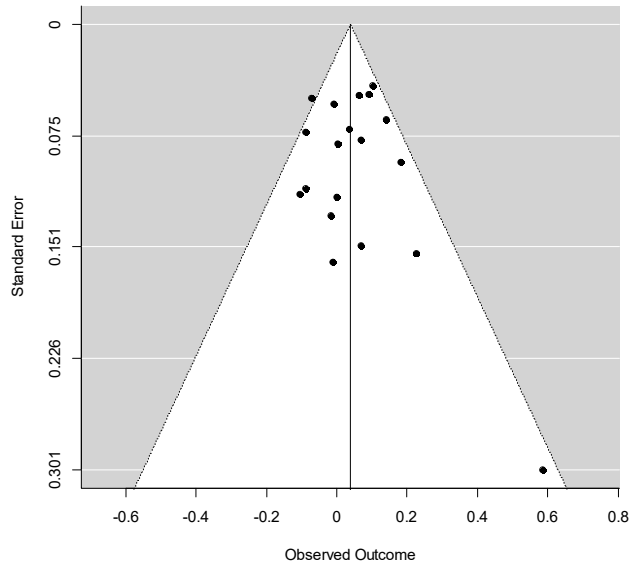

test for funnel plot asymmetry:  
 $z = 0.4681, p = 0.6397$   
 $I^2(\%) = 25.3 (0.0-76.4)$   
 $H^2 = 1.33 (1.0-4.24)$

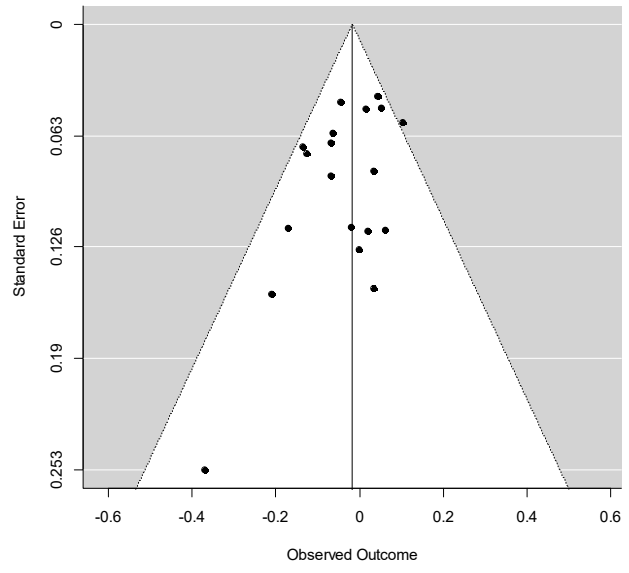

test for funnel plot asymmetry:  
 $z = -1.9254, p = 0.0542$   
 $I^2(\%) = 21.1 (0.0-67.5)$   
 $H^2 = 1.26 (1.0-3.07)$

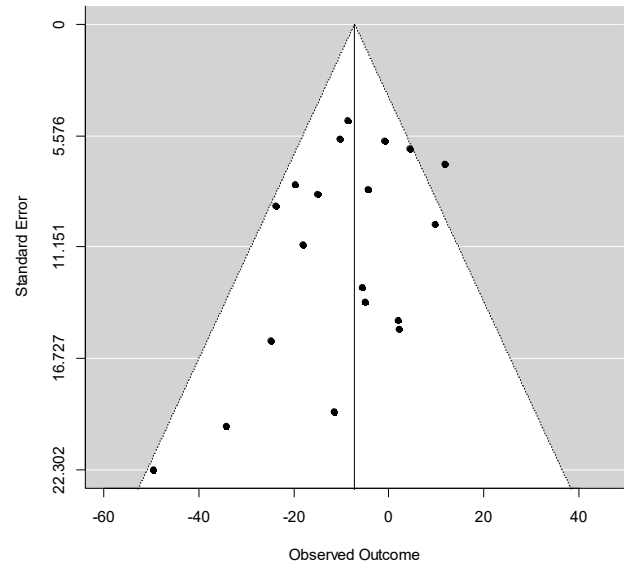

test for funnel plot asymmetry:  
 $z = -1.6834, p = 0.0923$   
 $I^2(\%) = 37.1 (0.00-78.7)$   
 $H^2 = 1.58 (1.0-4.70)$

# Supplemental Figure 7. Two-step meta-analyses and funnel plots for the association of FT4 with SGA, LGA or BW.

## SGA

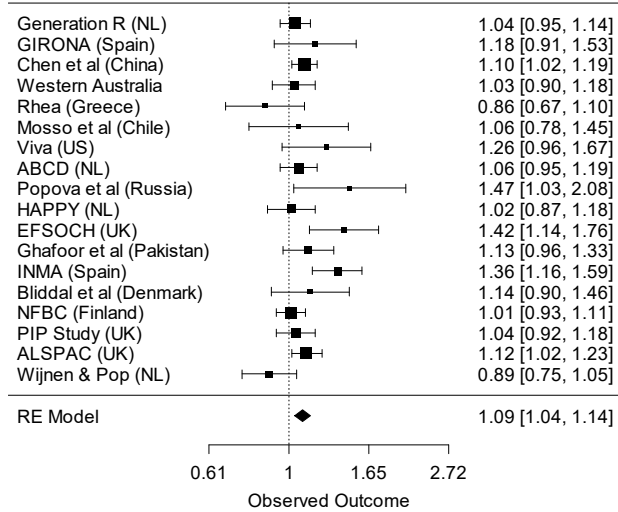

## LGA

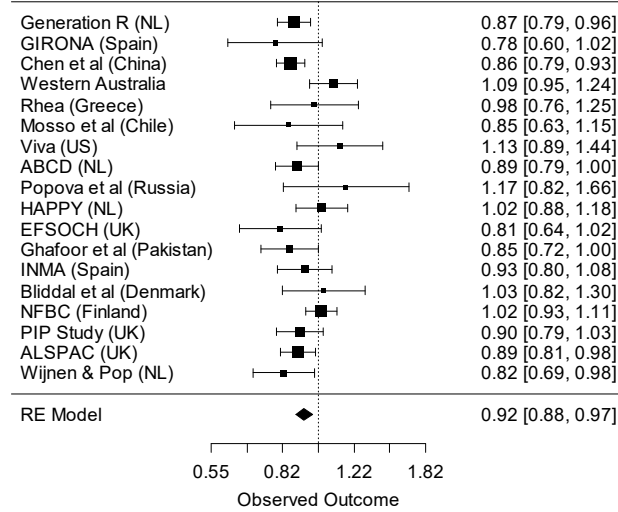

## BW

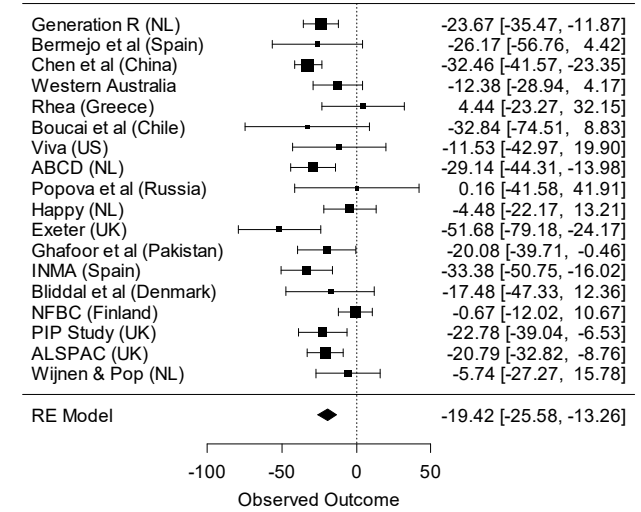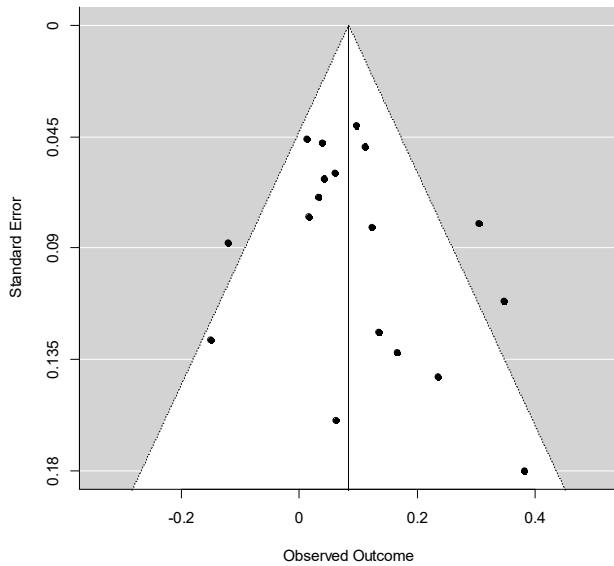

test for funnel plot asymmetry:  
 $z = 1.3875, p = 0.1653$   
 $I^2(\%) = 47.2 (8.71-86.2)$   
 $H^2 = 1.89 (1.10-7.22)$

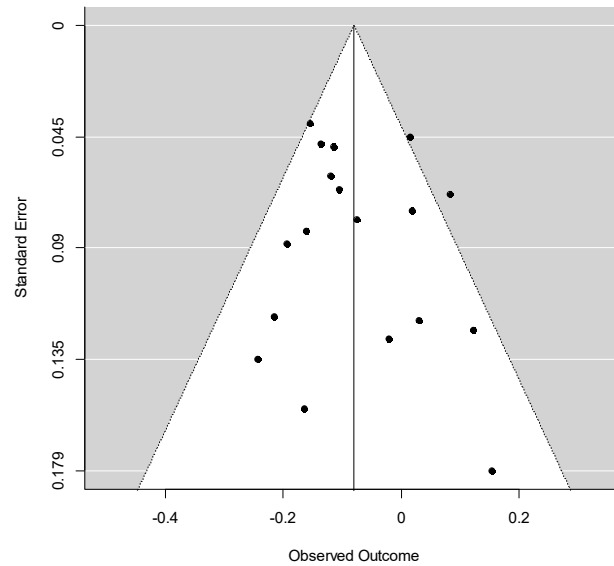

test for funnel plot asymmetry:  
 $z = 0.5681, p = 0.5700$   
 $I^2(\%) = 41.6 (0.0-78.5)$   
 $H^2 = 1.71 (1.0-4.65)$

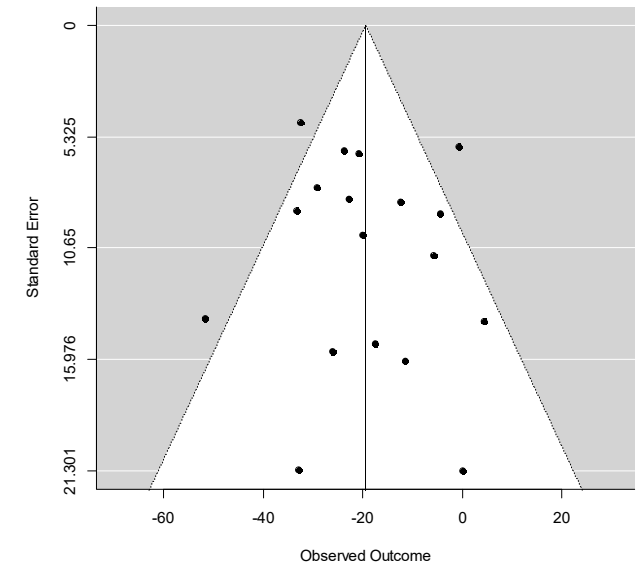

test for funnel plot asymmetry:  
 $z = 0.3649, p = 0.7152$   
 $I^2(\%) = 50.2 (14.1-80.3)$   
 $H^2 = 2.01 (1.16-5.09)$

# Supplemental Figure 8. Two-step meta-analyses and funnel plots for the association of TPOAb positivity with SGA, LGA or BW.

## SGA

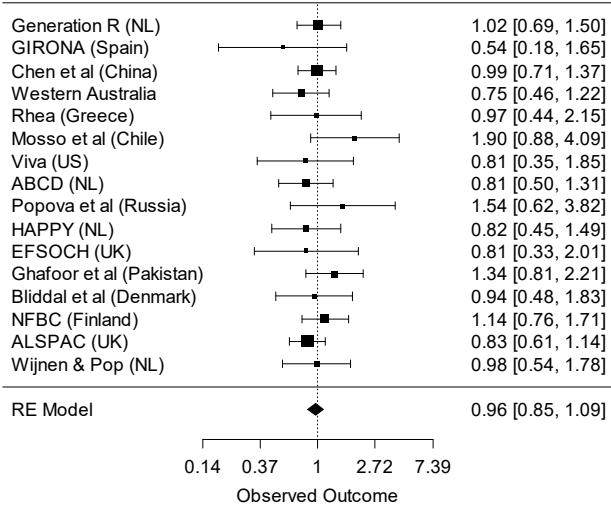

## LGA

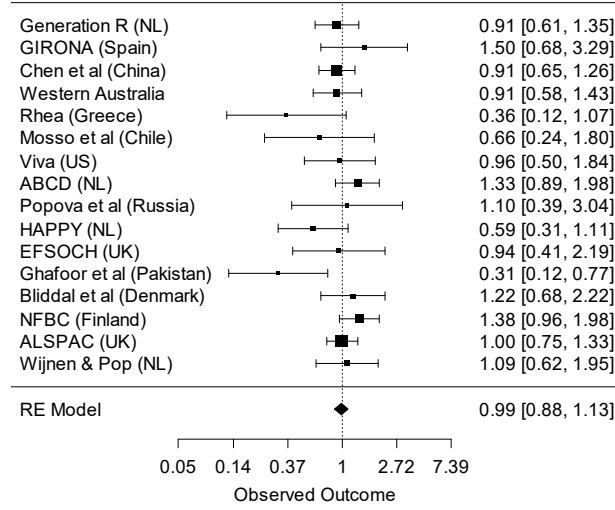

## BW

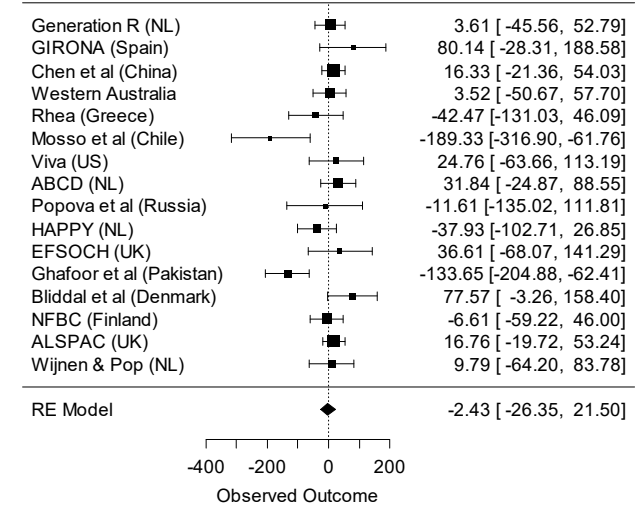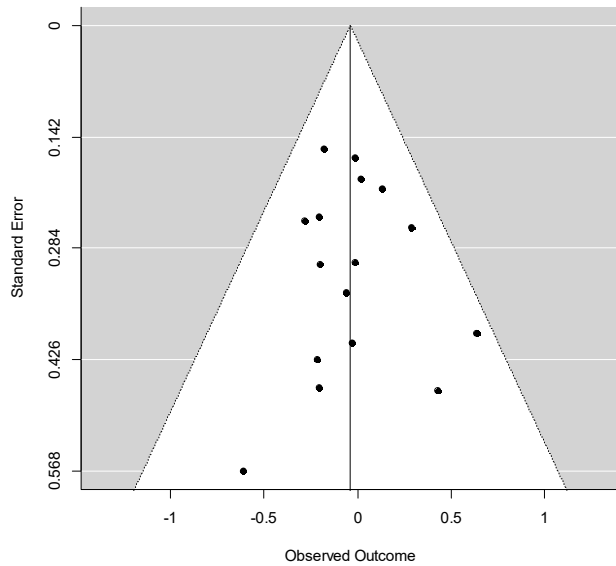

test for funnel plot asymmetry:  
 $z = 0.2695$ ,  $p = 0.7875$   
 $I^2(\%) = 0.0$  (0.0-46.7)  
 $H^2 = 1.0$  (1.0-1.87)

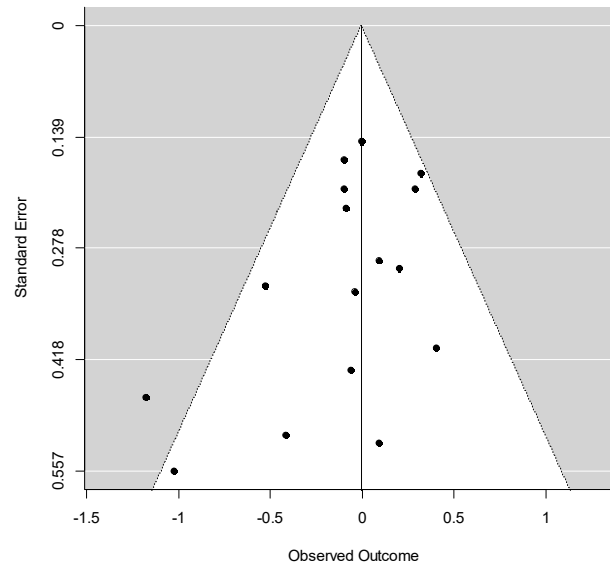

test for funnel plot asymmetry:  
 $z = -1.8658$ ,  $p = 0.0621$   
 $I^2(\%) = 0.001$  (0.0-81.4)  
 $H^2 = 1.01$  (1.0-5.36)

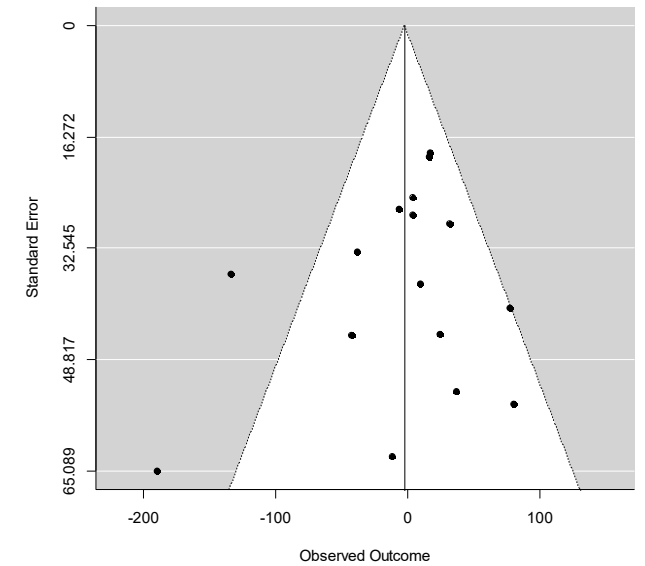

test for funnel plot asymmetry:  
 $z = -0.9865$ ,  $p = 0.3239$   
 $I^2(\%) = 51.5$  (25.5-89.5)  
 $H^2 = 2.06$  (1.34-9.52)

# Supplemental Figure 9. Two-step meta-analyses and funnel plots for the association of TgAb positivity with SGA, LGA or BW.

## SGA

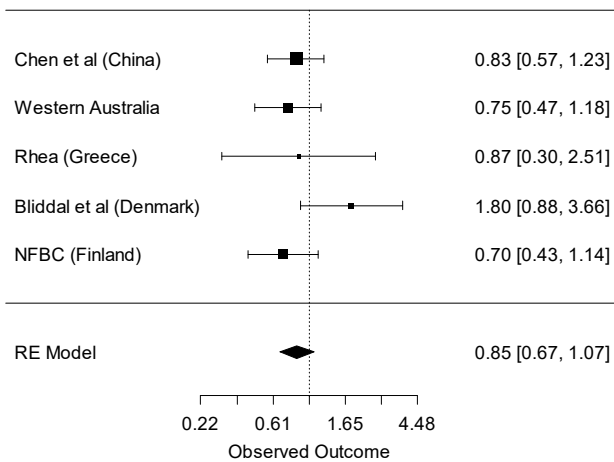

## LGA

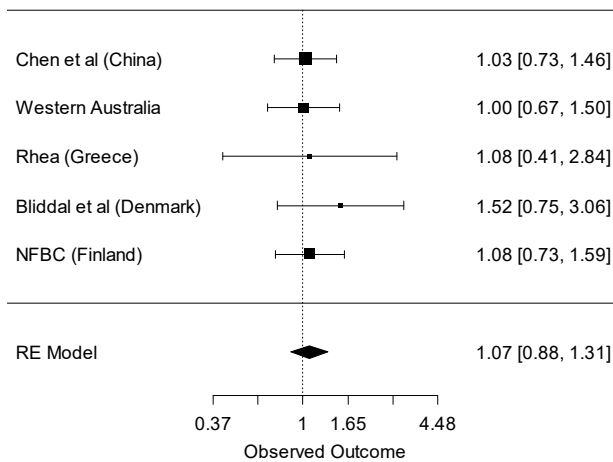

## BW

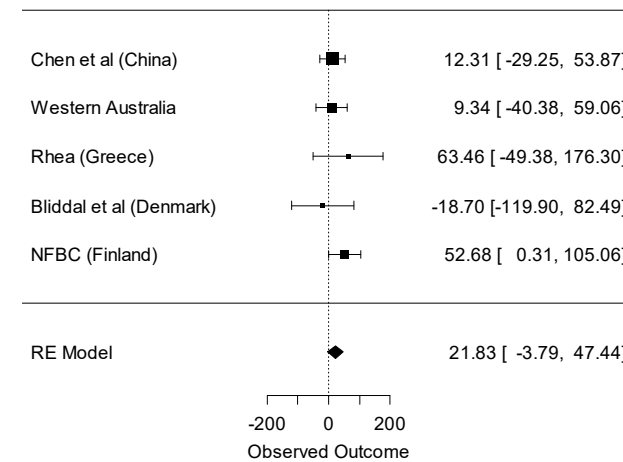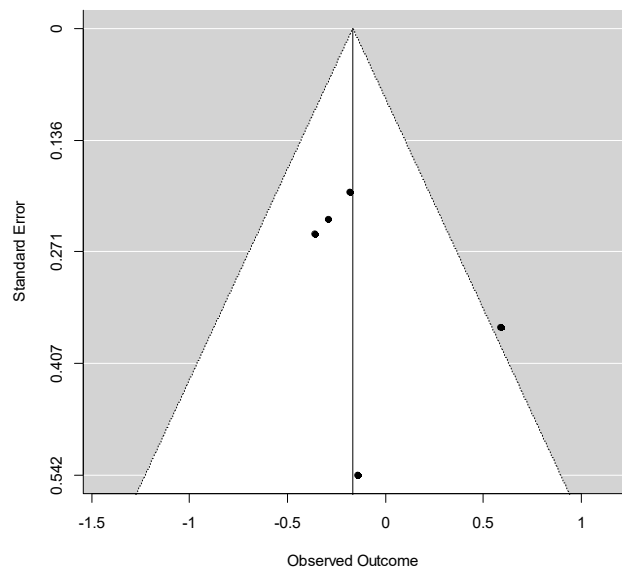

test for funnel plot asymmetry:  
 $z = -1.4895$ ,  $p = 0.1364$   
 $I^2(\%) = 31.5$  (0.0-78.9)  
 $H^2 = 1.46$  (1.0-4.74)

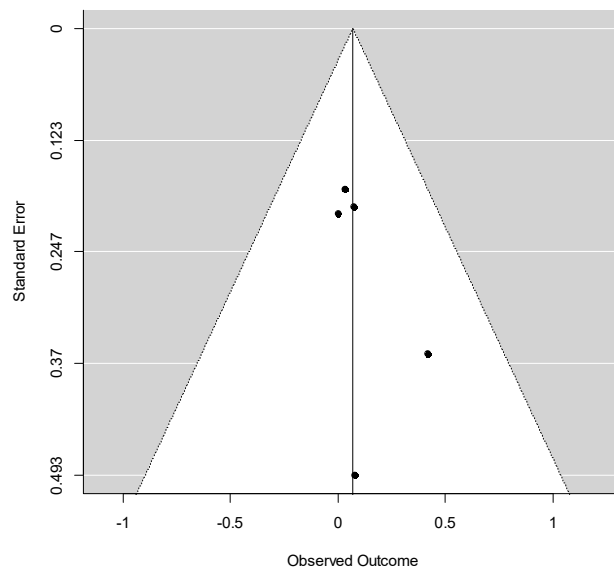

test for funnel plot asymmetry:  
 $z = 0.6250$ ,  $p = 0.5320$   
 $I^2(\%) = 0.0$  (0.0-68.1)  
 $H^2 = 1.0$  (1.0-3.14)

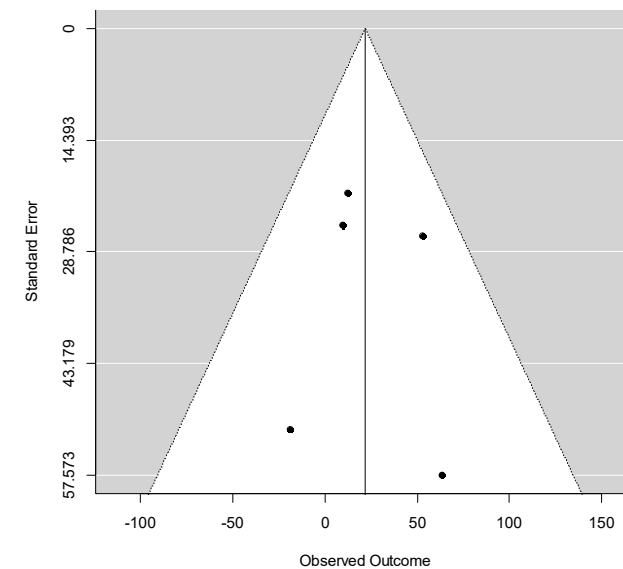

test for funnel plot asymmetry:  
 $z = 0.1982$ ,  $p = 0.8429$   
 $I^2(\%) = 0.0$  (0.0-9.55)  
 $H^2 = 1.0$  (1.0-1.10)

## **Supplemental acknowledgements and grant details**

### **ABCD**

The ABCD-study thanks all participating mothers and children for their valuable cooperation and all participating hospitals, obstetric clinics, general practitioners and Youth Health Care Centers their contribution to data collection. This work was supported by the Netherlands Organization for Health Research and Development (grant 2100.0076).

### **ALSPAC**

Funding: The UK Medical Research Council and the Wellcome Trust (Grant ref: 102215/2/13/2) and the University of Bristol provide core support for the Avon Longitudinal Study of Parents and Children. This research was specifically funded by the Chief Scientist Office (ETM/97/90357/130024782).

### **Bliddal et al. cohort**

Ulla Feldt-Rasmussen and Sofie Bliddal represent the "Copenhagen Thyroid and Pregnancy Group" with authors also including Malene Boas, Linda Hilsted, Lennart Friis-Hansen and Ann Tabor. The study was funded by: Musikforlæggerne Agnes og Knut Mørks Foundation (2010, 2012); the Danish Council for Independent Research: Medical Sciences (2010); Axel Muusfeldt's Foundation (2010, 2013); the Foundation of 17.12.1981 (2010); Videnskabsminister Erna Hamilton Foundation (2012); Director Ib Henriksen Foundation (2012); Snedkermester Sophus Jacobsen og hustru Astrid Jacobsen's Foundation (2010, 2013); the Faculty of Medical Science's Foundation (2013); Frimodt-Heineke Foundation (2013); Torben and Alice Frimodt's Foundation (2012); A.P. Møller Foundation for the Advancement of Medical Science (2012); Familien Hede Nielsens Foundation (2013); and the Copenhagen University Foundation (2013).

### **Generation R**

We gratefully acknowledge the contribution of the general practitioners, hospitals, midwives, and pharmacies in Rotterdam.

### **Ghafoor et al. cohort**

This study was made possible via a grant from the UK Department for International Development.

### **GIRONA**

The study was supported by grants from the Ministerio de Ciencia e Innovación, Instituto de Salud Carlos III, Madrid, Spain (MS12/03239 and PI14/01625 to J.B and PI16/01335 to A.L-B), projects co-funded by FEDER (Fondo Europeo de Desarrollo Regional).

We want to particularly acknowledge the patients and the IDIBGI Biobank (Biobanc IDIBGI, B.0000872), integrated in the Spanish National Biobank Network. Samples and data from patients included in this study were provided by the IDIBGI Biobank (Biobanc IDIBGI, B.0000872 Xarxa de Bancs de Tumors de Catalunya (XBTC) Catalunya, and they were processed following standard operating procedures with the appropriate approval of the Ethics and Scientific Committees.

## **INMA**

This study was funded by grants from Instituto de Salud Carlos III (Red INMA G03/176 CB06/02/0041; FIS-FEDER: PI03/1615, PI04/1509, PI04/1112, PI04/1931, FIS-PI042018, PI05/1079, PI05/1052, FIS-PI06/0867, PI06/1213, PI07/0314, PI09/02647, FIS-PI09/02311, FIS-PI09/00090, PI11/01007, PI11/02591, PI11/02038, FIS-PI13/02429, PI13/1944, PI13/2032, FIS-PI13/02187, PI14/00891, PI14/01687, PI16/1288, and PI17/00663; Miguel Servet-FEDER CP11/00178, CP15/00025, CPII16/00051, MS13/00054, CPII18/00018), Generalitat de Catalunya-CIRIT 1999SGR 00241, EU comission (FP7-ENV-2011 cod 282957, HEALTH.2010.2.4.5-1, 634453), Generalitat Valenciana, FISABIO (UGP 15-230, UGP-15-244, and UGP-15-249), Alicia Koplowitz Foundation 2017, CIBERESP, Obra Social Cajastur/Fundación Liberbank, UNIVERSIDAD DE OVIEDO, Department of Health of the Basque Government (2005111093, 2009111069, 2013111089 and 2015111065), and the Provincial Government of Gipuzkoa (DFG06/002, DFG08/001 and DFG15/221) and annual agreements with the municipalities of the study area (Zumarraga, Urretxu , Legazpi, Azkoitia y Azpeitia y Beasain). ISGlobal is a member of the CERCA Programme, Generalitat de Catalunya.

### **Popova et al. Cohort**

We gratefully acknowledge the contribution of study participants, the staff of Obstetrics & Gynecology Clinic No 22, Saint-Petersburg, Russia, represented by Alla E. Nikolaeva, MD, PhD and Flora R. Cutueva, MD. We also gratefully acknowledge the contributions of Alexandra Tkachuk, MD, Ekaterina Shilova, MD and Anna Anopova, MD to data collection and management. The study was funded by Russian Science Foundation (Grant number 18-75-10042)

### **PIP Study**

The PIP study was supported by the European Union's Sixth Framework Programme "InGenious HyperCare" (LSHM-CT-2006-037093) and a Strategic Research Development grant from the Scottish Funding Council. CD is supported by a British Heart Foundation Centre of Research Excellence Award (RE/18/6/34217) and DC is supported by an NHS Research Scotland Career Researcher Fellowship.
